# Supplementary material
Source: PubMed Central journal article supplement (PMC3855429)
Supplement: NIHMS508889-supplement-1_si_001.pdf [file NIHMS508889-supplement-1_si_001.pdf]

## **Supporting Information**

### **Mechanistic Study of the Biomimetic Synthesis of Flavonolignan**

#### **Diastereoisomers in Milk Thistle**

Hanan S. Althagafy, Maria Elena Meza-Aviña, Nicholas H. Oberlies,<sup>\*</sup> and Mitchell P. Croatt<sup>\*</sup>

*Department of Chemistry and Biochemistry, University of North Carolina at Greensboro, 435 Sullivan Science Building, P.O. Box 26170, Greensboro, NC,27402, USA*

\* Corresponding authors. Tel.: (336)334-3785 (M.P.C.) and (336)334-5474 (N.H.O.).

E-mail addresses: [mpcroatt@uncg.edu](mailto:mpcroatt@uncg.edu) (M.P.C) and [nicholas\\_oberlies@uncg.edu](mailto:nicholas_oberlies@uncg.edu) (N.H.O.)

| <b>Table of Contents</b>                                                                                                                                              | <b>Page</b> |
|-----------------------------------------------------------------------------------------------------------------------------------------------------------------------|-------------|
| <b>Figure S1.</b> UPLC chromatograms of natural flavonolignans in silymarin compared with the product of the biomimetic reaction (Scheme 2)                           | S4          |
| <b>Figure S2.</b> UPLC chromatograms of biomimetic synthesis of flavonolignans (Scheme 2)                                                                             | S5          |
| <b>Figure S3.</b> UPLC chromatograms of <i>cis</i> -coniferyl alcohol and its reaction with taxifolin (Scheme 3)                                                      | S6          |
| <b>Figure S4.</b> UPLC chromatograms of oxidation reactions of taxifolin and coniferyl alcohol (Scheme 4)                                                             | S7          |
| <b>Figure S5.</b> UPLC chromatograms of reactions of taxifolin and coniferyl aldehyde (Scheme 5)                                                                      | S8          |
| <b>Figure S6.</b> UPLC chromatograms of co-injection of biomimetic and natural flavonolignans (left column) and purified biomimetic flavonolignans (right column)     | S9          |
| <b>Figure S7.</b> <sup>1</sup> H NMR spectra (500 MHz in DMSO- <i>d</i> <sub>6</sub> ) of natural (top) and biomimetic (bottom) silybin A                             | S10         |
| <b>Figure S8.</b> <sup>13</sup> C NMR spectra (125 MHz in DMSO- <i>d</i> <sub>6</sub> ) of natural (top) and biomimetic (bottom) silybin A                            | S11         |
| <b>Figure S9.</b> <sup>1</sup> H NMR spectra (500 MHz in DMSO- <i>d</i> <sub>6</sub> ) of natural (top) and biomimetic (bottom) silybin B                             | S12         |
| <b>Figure S10.</b> <sup>13</sup> C NMR spectra (125 MHz in DMSO- <i>d</i> <sub>6</sub> ) of natural (top) and biomimetic (bottom) silybin B                           | S13         |
| <b>Figure S11.</b> <sup>1</sup> H NMR spectra (500 MHz in DMSO- <i>d</i> <sub>6</sub> ) of natural (top) and biomimetic (bottom) isosilybin A                         | S14         |
| <b>Figure S12.</b> <sup>13</sup> C NMR spectra (125 MHz in DMSO- <i>d</i> <sub>6</sub> ) of natural (top) and biomimetic (bottom) isosilybin A                        | S15         |
| <b>Figure S13.</b> <sup>1</sup> H NMR spectra (500 MHz in DMSO- <i>d</i> <sub>6</sub> ) of natural (top) and biomimetic (bottom) isosilybin B                         | S16         |
| <b>Figure S14.</b> <sup>13</sup> C NMR spectra (125 MHz in DMSO- <i>d</i> <sub>6</sub> ) of natural (top) and biomimetic (bottom) isosilybin B                        | S17         |
| <b>Table S1.</b> <sup>1</sup> H NMR data (500 MHz in DMSO- <i>d</i> <sub>6</sub> ) comparing natural flavonolignans to the biomimetic counterparts                    | S18         |
| <b>Table S2.</b> <sup>13</sup> C NMR data (125 MHz in DMSO- <i>d</i> <sub>6</sub> ) comparing natural flavonolignans to the biomimetic counterparts                   | S19         |
| <b>Figure S15.</b> <sup>1</sup> H NMR spectra (500 MHz in acetone- <i>d</i> <sub>6</sub> ) of purchased (top) and synthetic (bottom) coniferyl aldehyde ( <b>16</b> ) | S20         |
| <b>Figure S16.</b> <sup>1</sup> H NMR spectrum (500 MHz in acetone- <i>d</i> <sub>6</sub> ) of (±)-dehydrodiconiferyl alcohol ( <b>18</b> )                           | S21         |
| <b>Figure S17.</b> <sup>13</sup> C NMR spectrum (125 MHz in acetone- <i>d</i> <sub>6</sub> ) of (±)-dehydrodiconiferyl alcohol ( <b>18</b> )                          | S22         |

|                                                                                                                                                                        |     |
|------------------------------------------------------------------------------------------------------------------------------------------------------------------------|-----|
| <b>Table S3.</b> $^1\text{H}$ NMR data (500 MHz in acetone- $d_6$ ) comparing biomimetic ( $\pm$ )-dehydrodiconiferyl alcohol ( <b>18</b> ) to the literature data     | S23 |
| <b>Table S4.</b> $^{13}\text{C}$ NMR data (125 MHz in $\text{CDCl}_3$ ) comparing biomimetic ( $\pm$ )-dehydrodiconiferyl alcohol ( <b>18</b> ) to the literature data | S24 |
| <b>Figure S18.</b> $^1\text{H}$ NMR spectrum (500 MHz in $\text{CDCl}_3$ ) of 4-(3-hydroxyprop-1-yn-1-yl)-2-methoxyphenol                                              | S25 |
| <b>Figure S19.</b> $^{13}\text{C}$ NMR spectrum (125 MHz in $\text{CDCl}_3$ ) of 4-(3-hydroxyprop-1-yn-1-yl)-2-methoxyphenol                                           | S26 |
| <b>Figure S20.</b> $^1\text{H}$ NMR spectrum (500 MHz acetone- $d_6$ ) of <i>cis</i> -coniferyl alcohol ( <b>19</b> )                                                  | S27 |
| <b>Table S5.</b> $^1\text{H}$ NMR data (500 MHz in acetone- $d_6$ ) comparing biomimetic <i>cis</i> -coniferyl alcohol ( <b>19</b> ) to the literature data            | S28 |

**Figure S1.** UPLC chromatograms of natural flavonolignans in silymarin compared with the product of the biomimetic reaction (Scheme 2)

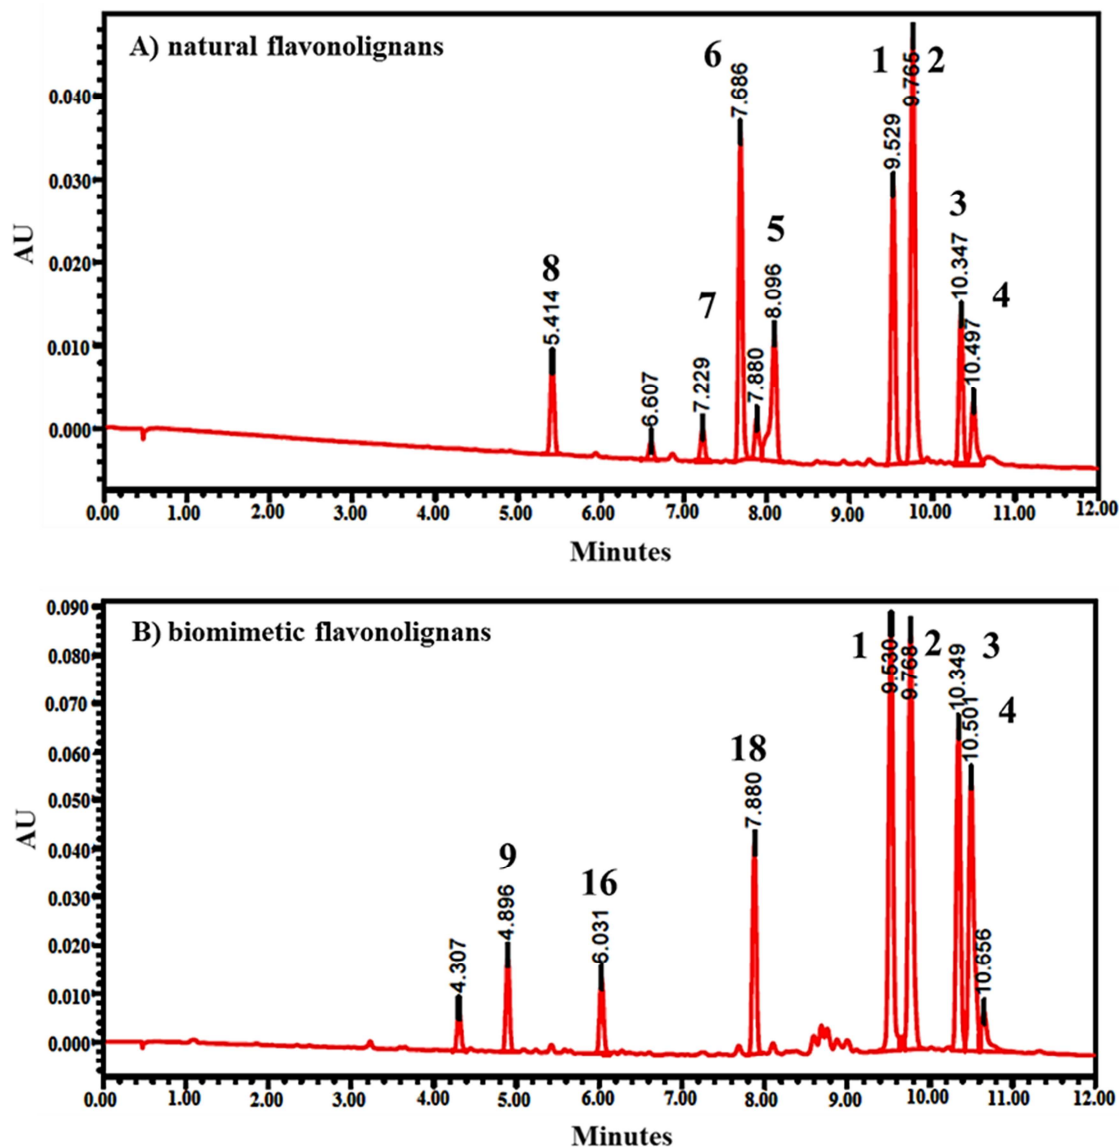

(A) natural flavonolignans; (B) reaction of taxifolin (1 equiv), *trans*-coniferyl alcohol (2 equiv), and Ag<sub>2</sub>O (4 equiv) in ethyl acetate (0.04 M) at 75 °C for 96 h. Compounds are silybin A (1); silybin B (2); isosilybin A (3); isosilybin B (4); silydianin (5); silychristin (6); isosilychristin (7); taxifolin (8); *trans*-coniferyl alcohol (9); coniferyl aldehyde (16); dehydroconiferyl alcohol (18).

**Method:** UPLC was conducted using a CH<sub>3</sub>OH/H<sub>2</sub>O (0.1% formic acid) gradient that initiated at 5:95 and increased to 50:50 over 10 min and held with that ratio for 2 min at a flow rate of 0.6 mL/min (50 °C) using an HSST3 column (1.8 μm, 2.1 × 100 mm) monitored at 288 nm.

**Figure S2.** UPLC chromatograms of biomimetic synthesis of flavonolignans (Scheme 2)

A) Crude reaction

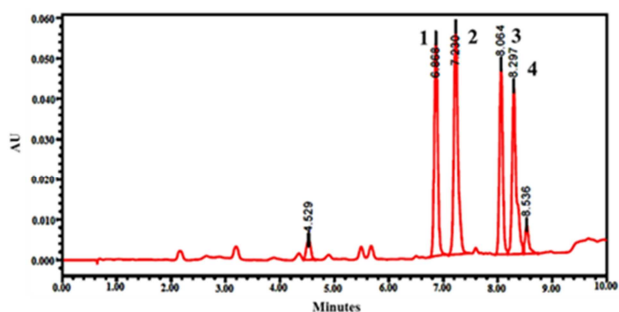

B) Co-injection of 1

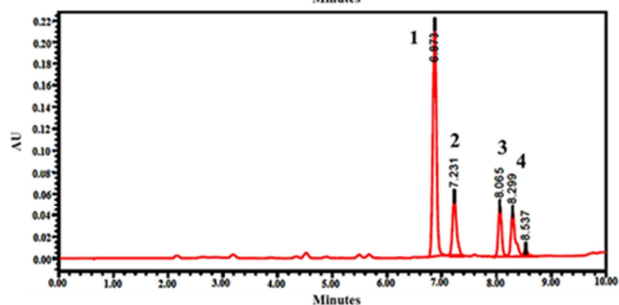

C) Co-injection of 2

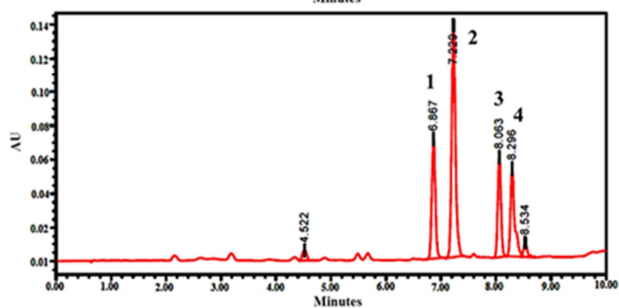

D) Co-injection of 3

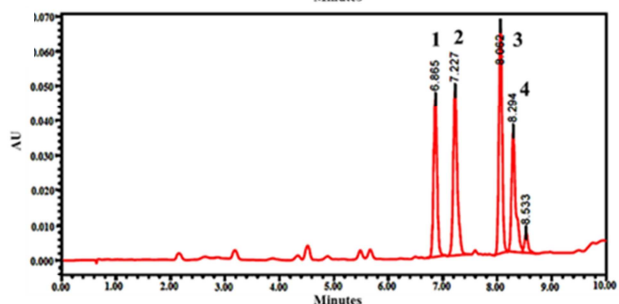

E) Co-injection of 4

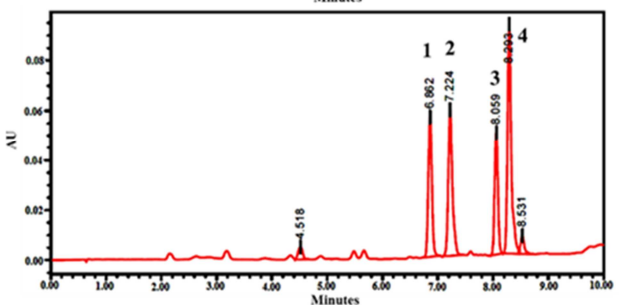

(A) reaction of taxifolin (1 equiv), *trans*-coniferyl alcohol (2 equiv), and Ag<sub>2</sub>O (4 equiv) in ethyl acetate (0.06 mM) at 75 °C for 96 h; with co-injection (B) of 1; (C) of 2; (D) of 3; (E) of 4. (Note: More dilute reaction resulted in more selective formation of the flavonolignans and minimization of the byproducts.)

**Method:** UPLC was conducted using a CH<sub>3</sub>OH/H<sub>2</sub>O gradient that initiated at 30:70 and increased to 60:40 over 10 min at a flow rate of 0.4 mL/min (40 °C) using an HSST3 column (1.8 μm, 2.1 × 100 mm) monitored at 288 nm.

**Figure S3.** UPLC chromatograms of *cis*-coniferyl alcohol and its reaction with taxifolin (Scheme 3)

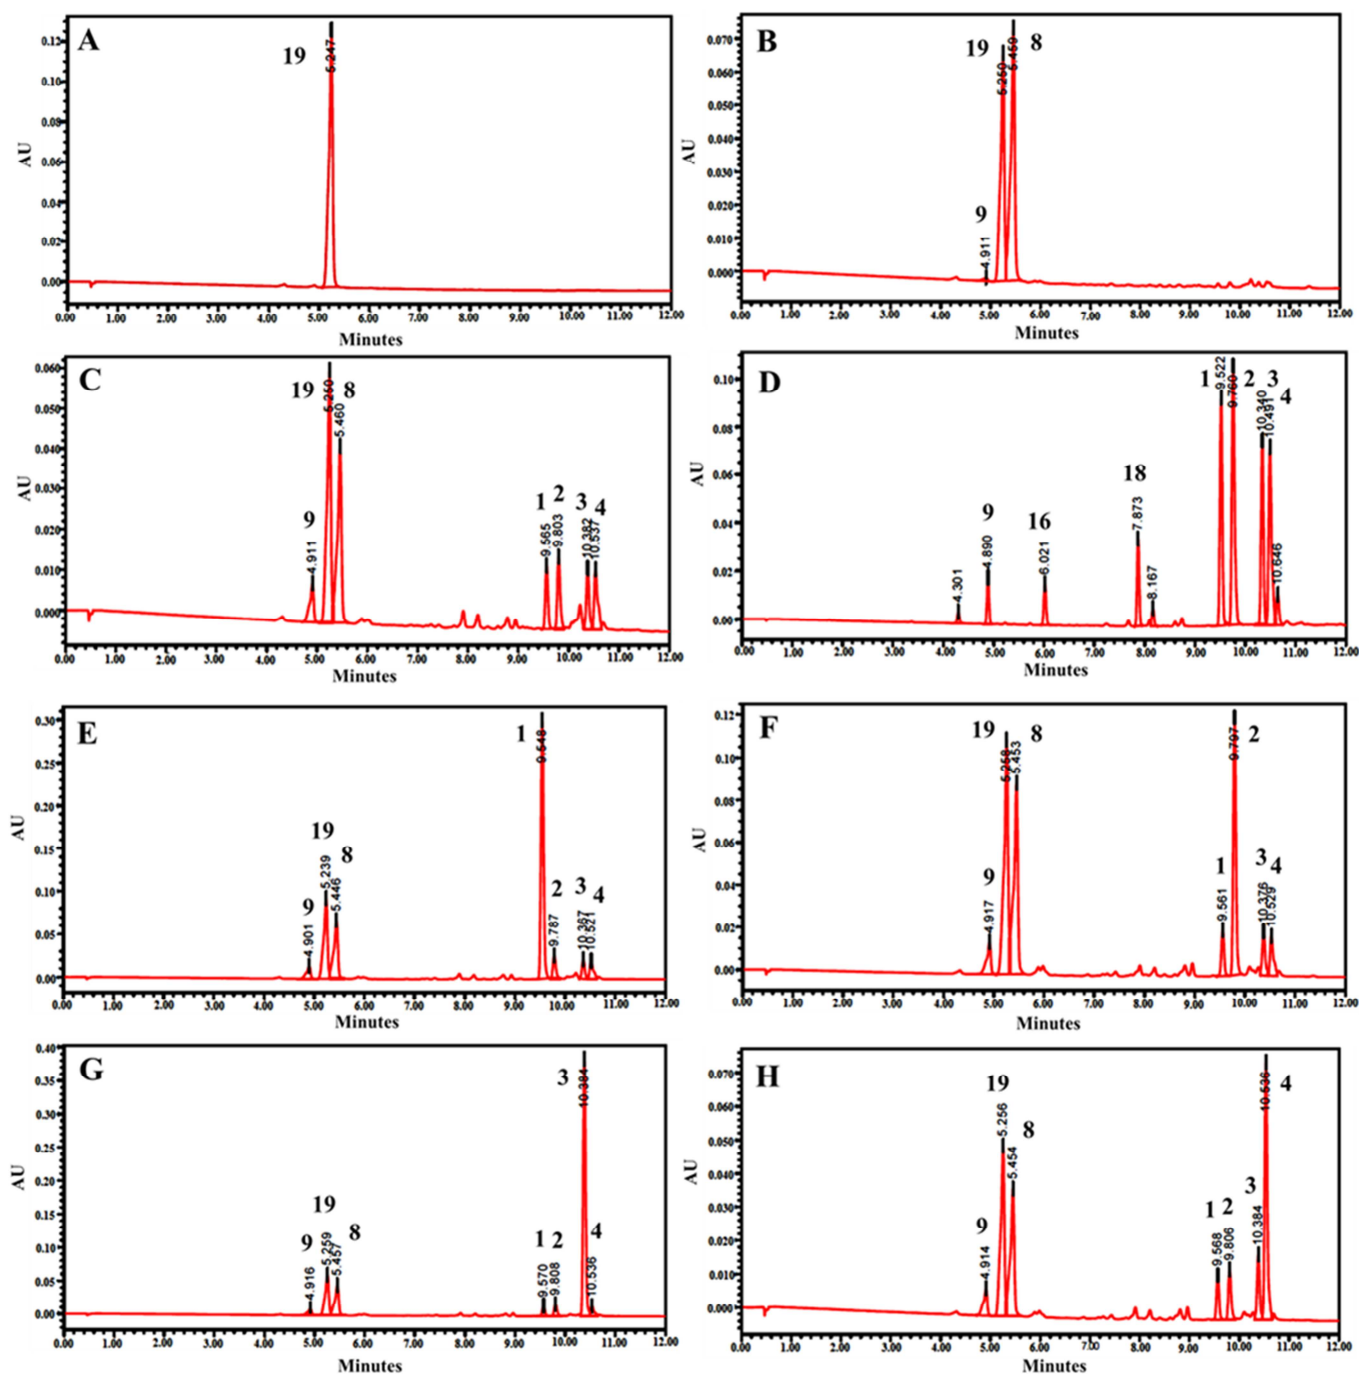

(A) *cis*-coniferyl alcohol; (B) reaction of *cis*-coniferyl alcohol (2 equiv) with taxifolin (1 equiv) and  $\text{Ag}_2\text{O}$  (4 equiv) in ethyl acetate (0.001 M) at 75 °C after 10 min.; (C) after 2.5 h; (D) after 96 h; (E) after 2.5 h with co-injection of silybin A ; (F) after 2.5 h with co-injection of silybin B; (G) after 2.5 h with co-injection of isosilybin A; (H) after 2.5 h with co-injection of isosilybin B.

**Method:** UPLC conditions same as in **Figure S1**.

**Figure S4.** UPLC chromatograms of oxidation reactions of taxifolin and coniferyl alcohol (Scheme 4)

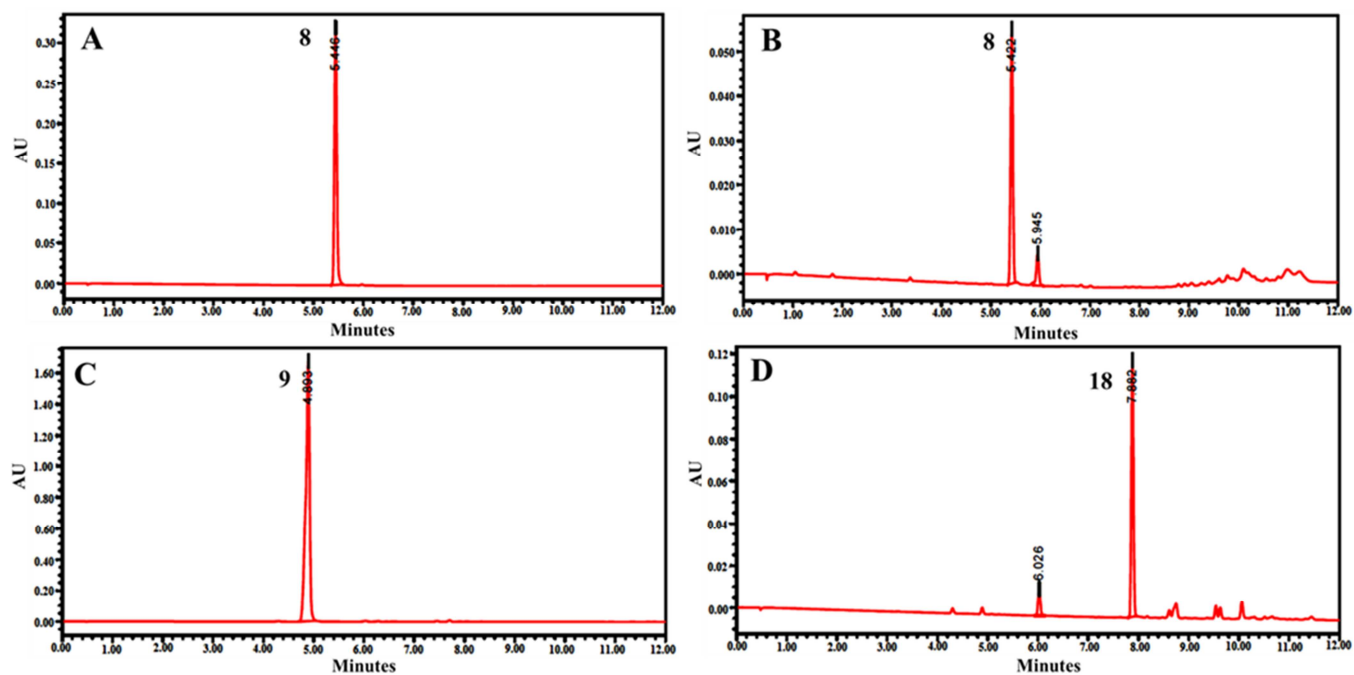

(A) taxifolin; (B) reaction of taxifolin (1 equiv) with Ag<sub>2</sub>O (4 equiv) in ethyl acetate (0.001 M) for 96 h at 75 °C; (C) *trans*-coniferyl alcohol; (D) reaction of *trans*-coniferyl alcohol (1 equiv) with Ag<sub>2</sub>O (2 equiv) in ethyl acetate (0.001 M) for 115 h at 75 °C.

**Method:** UPLC conditions same as in **Figure S1**.

**Figure S5.** UPLC chromatograms of reactions of taxifolin and coniferyl aldehyde (Scheme 5)

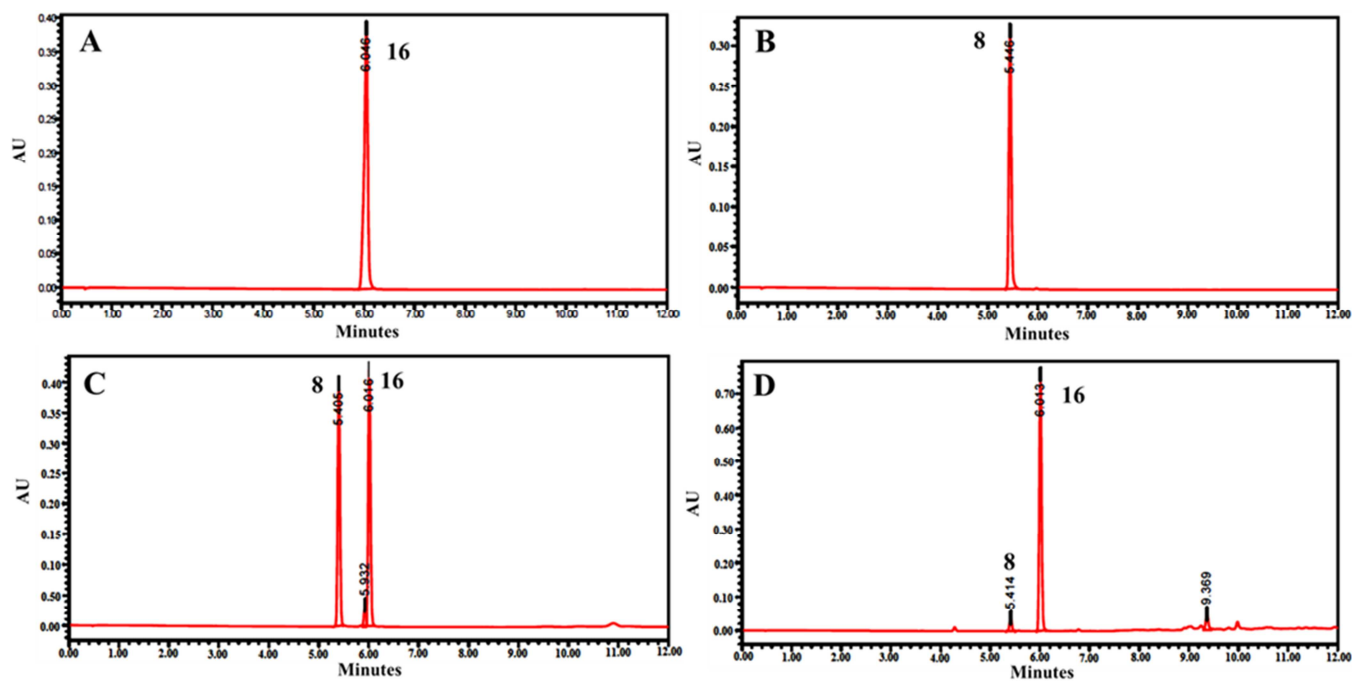

(A) coniferyl aldehyde; (B) taxifolin; (C) reaction of coniferyl aldehyde (2 equiv) with taxifolin (1 equiv) without  $\text{Ag}_2\text{O}$  in ethyl acetate (0.0005 M) for 96 h at 75 °C; (D) Reaction of coniferyl aldehyde (2 equiv) with taxifolin (1 equiv) and  $\text{Ag}_2\text{O}$  (4 equiv) in ethyl acetate (0.0005 M) for 96 h at 75 °C.

**Method:** UPLC conditions same as in **Figure S1**.



**Figure S6.** UPLC chromatograms of co-injection of biomimetic and natural flavonolignans (left column) and purified biomimetic flavonolignans (right column)

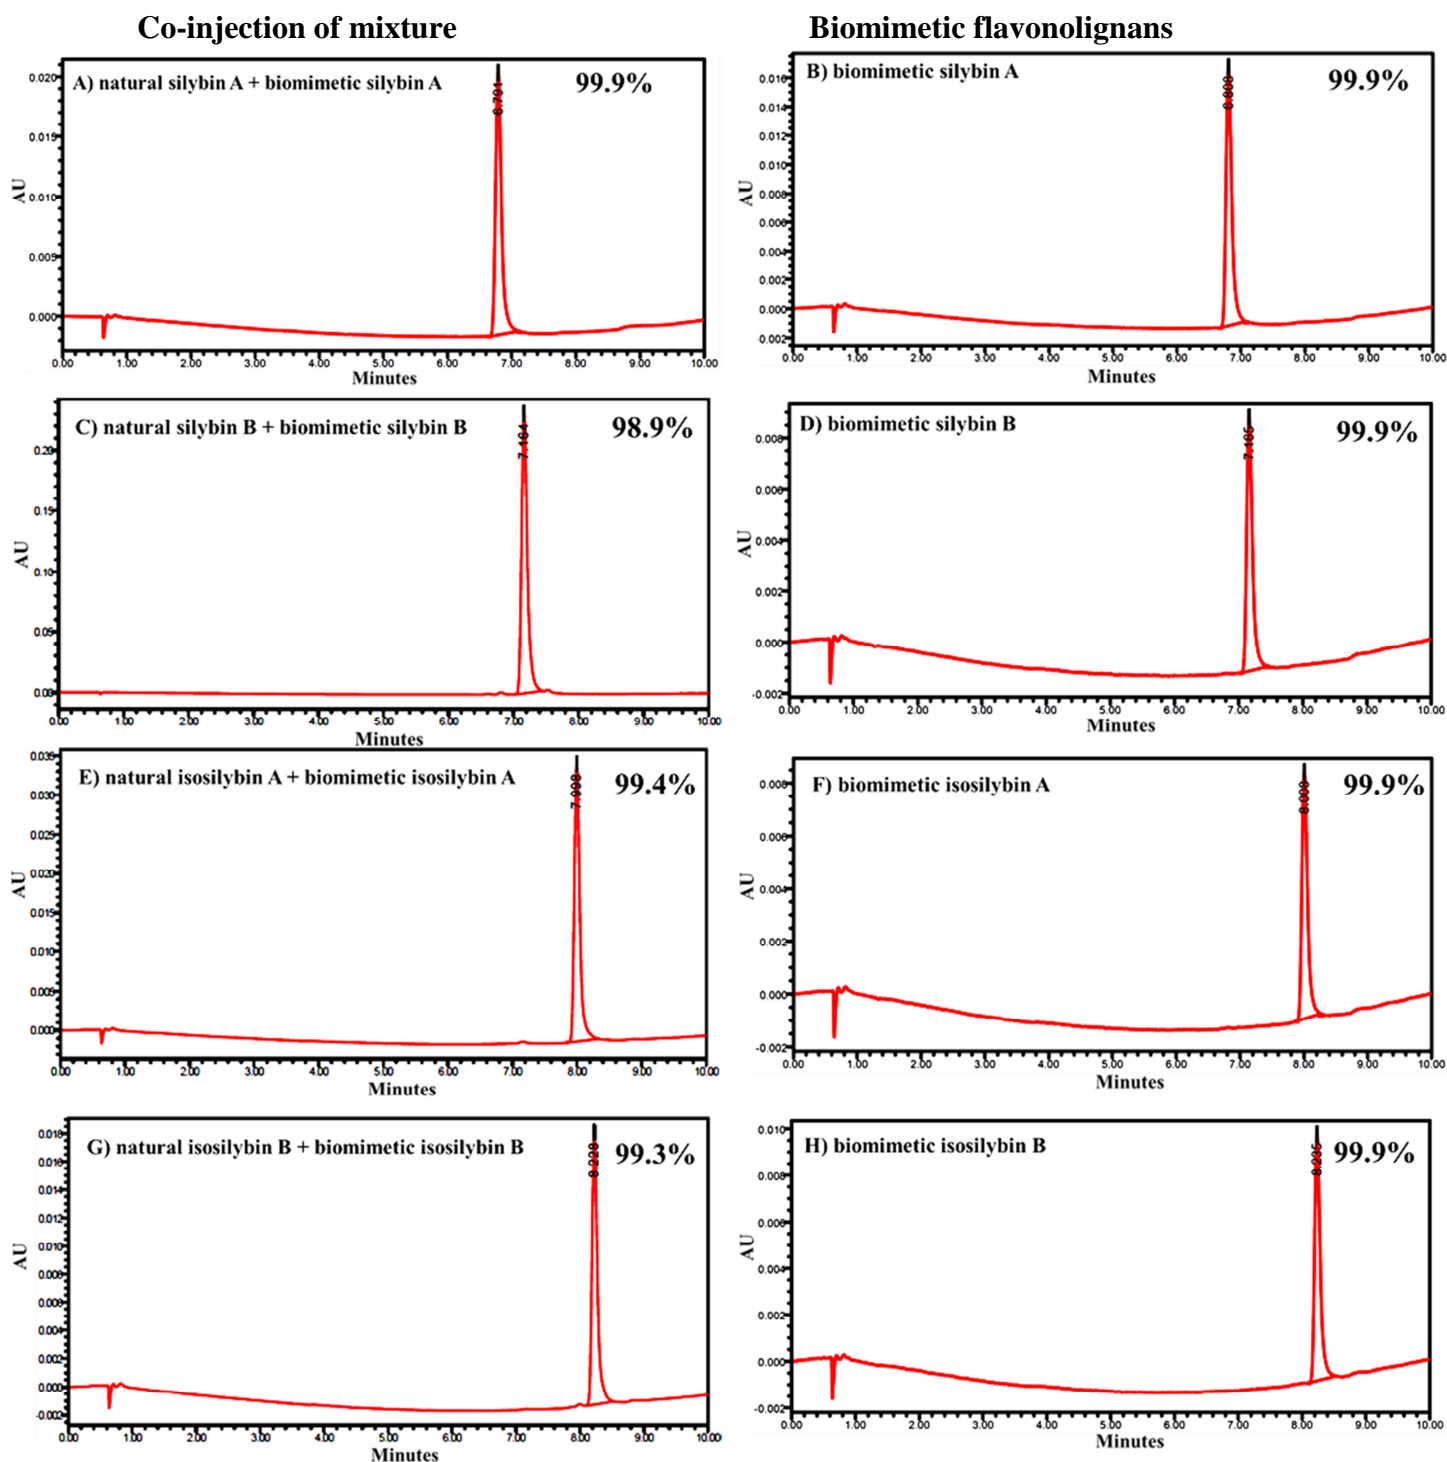

(A) natural silybin A and biomimetic silybin A; (B) biomimetic silybin A; (C) natural silybin B and biomimetic silybin B; (D) biomimetic silybin B (E) natural isosilybin A and biomimetic isosilybin A; (F) biomimetic isosilybin A; (G) natural isosilybin B and biomimetic isosilybin B; (H) biomimetic isosilybin B.

**Method:** UPLC conditions same as in **Figure S2**.

**Figure S7.**  $^1\text{H}$  NMR spectra (500 MHz in  $\text{DMSO-}d_6$ ) of natural (top) and biomimetic (bottom) silybin A

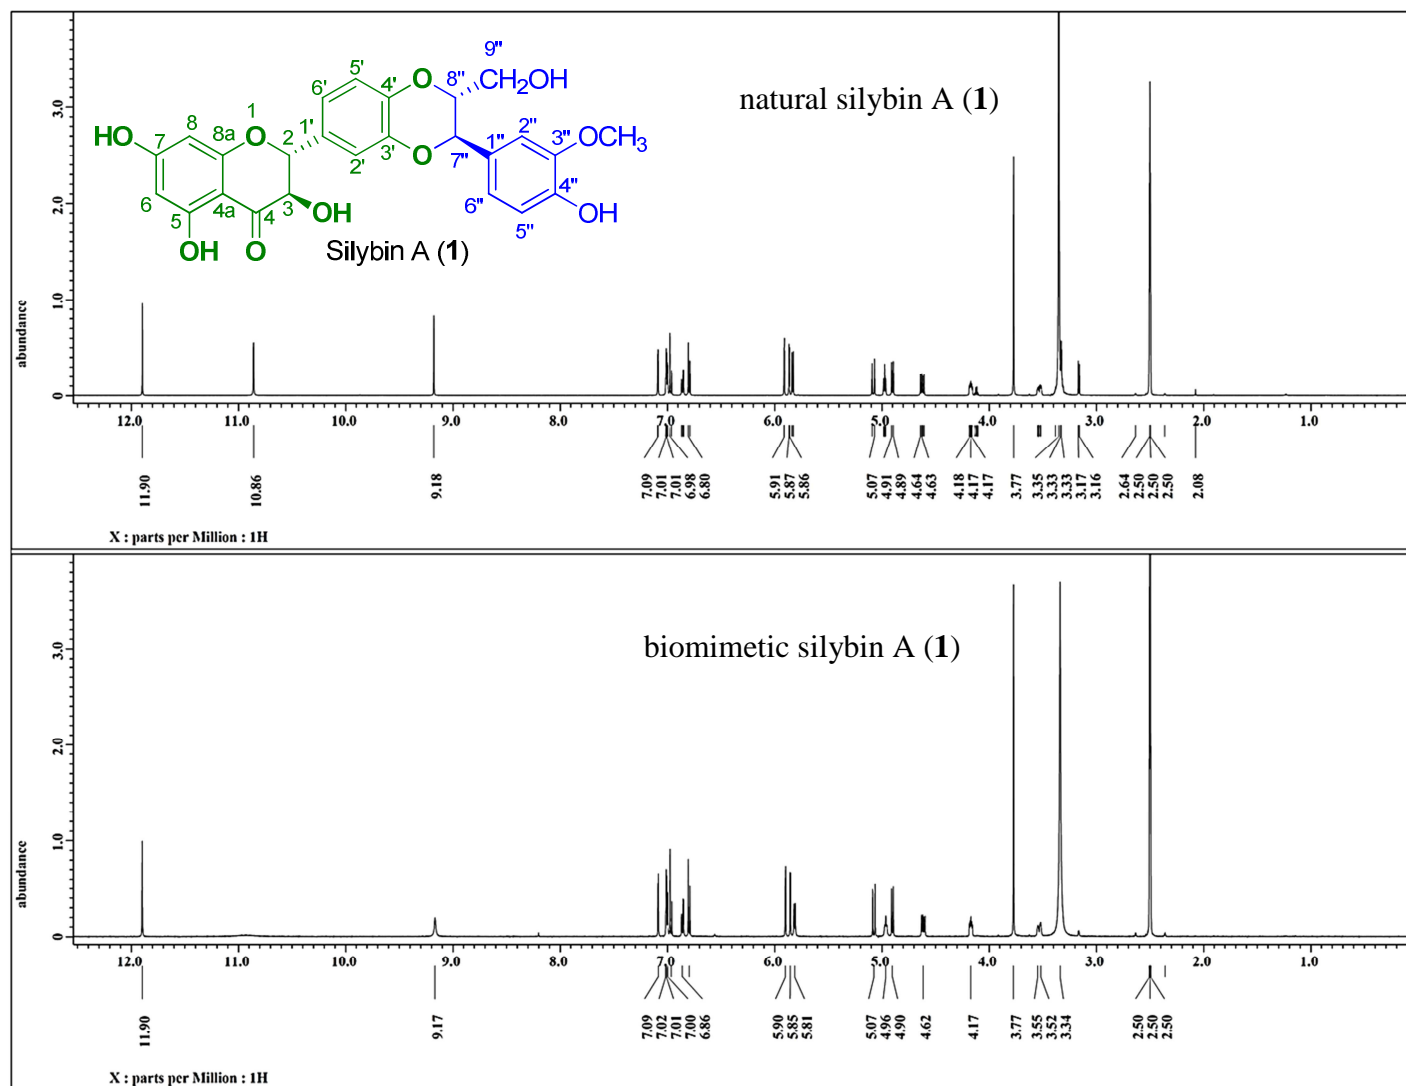

**Figure S8.**  $^{13}\text{C}$  NMR spectra (125 MHz in  $\text{DMSO-}d_6$ ) of natural (top) and biomimetic (bottom) silybin A

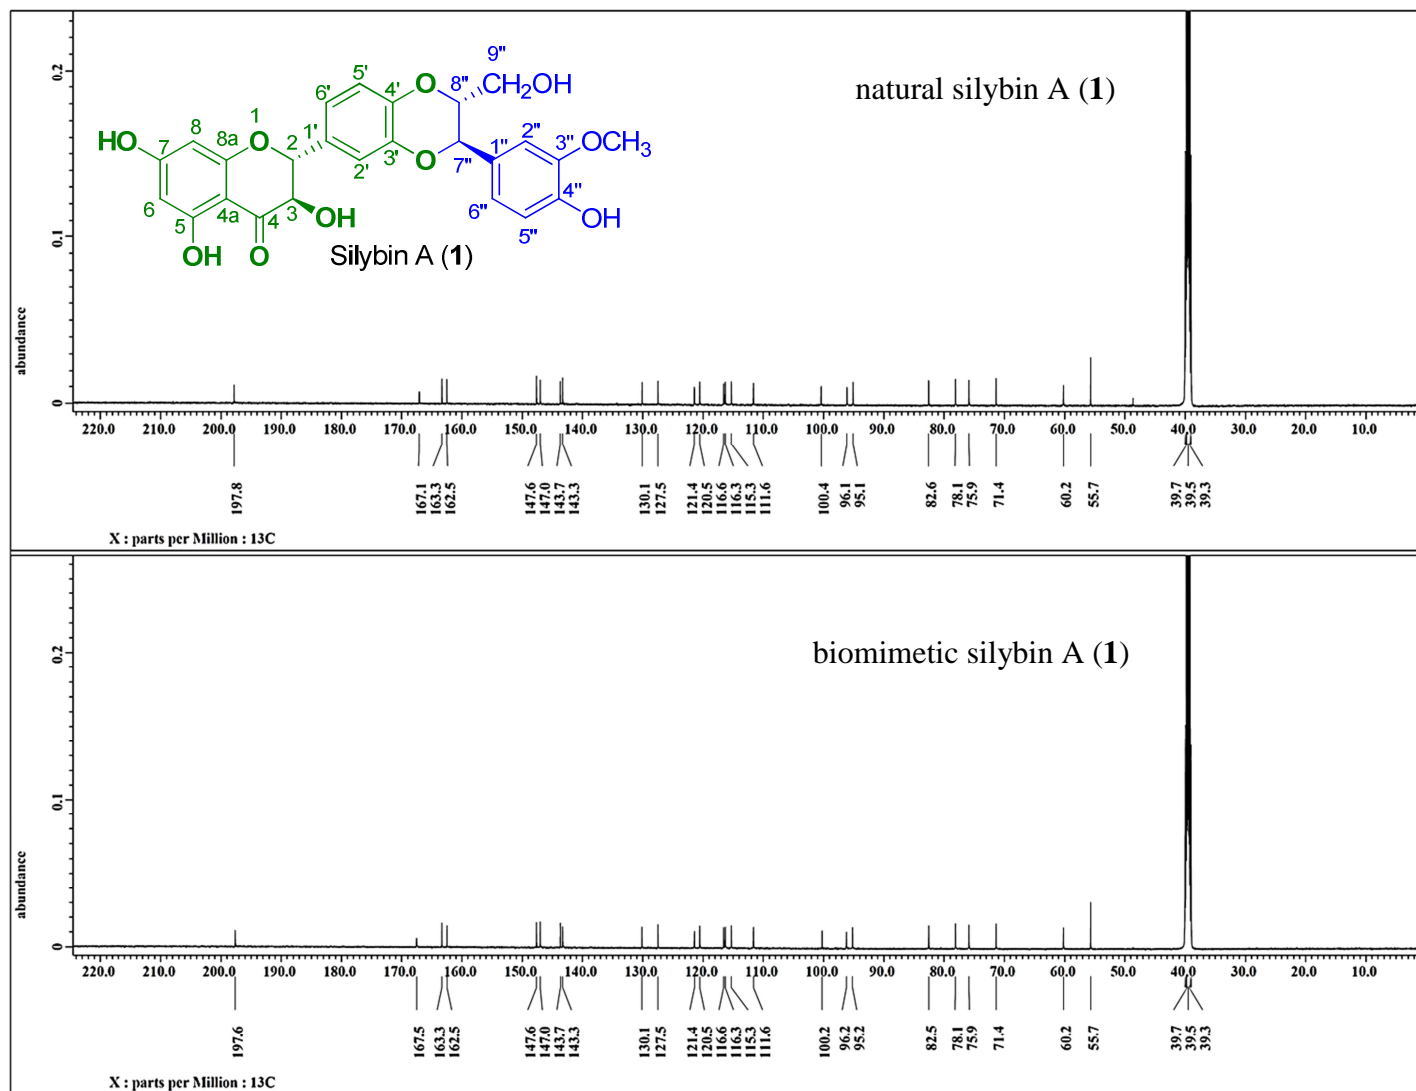

**Figure S9.**  $^1\text{H}$  NMR spectra (500 MHz in  $\text{DMSO-}d_6$ ) of natural (top) and biomimetic (bottom) silybin B

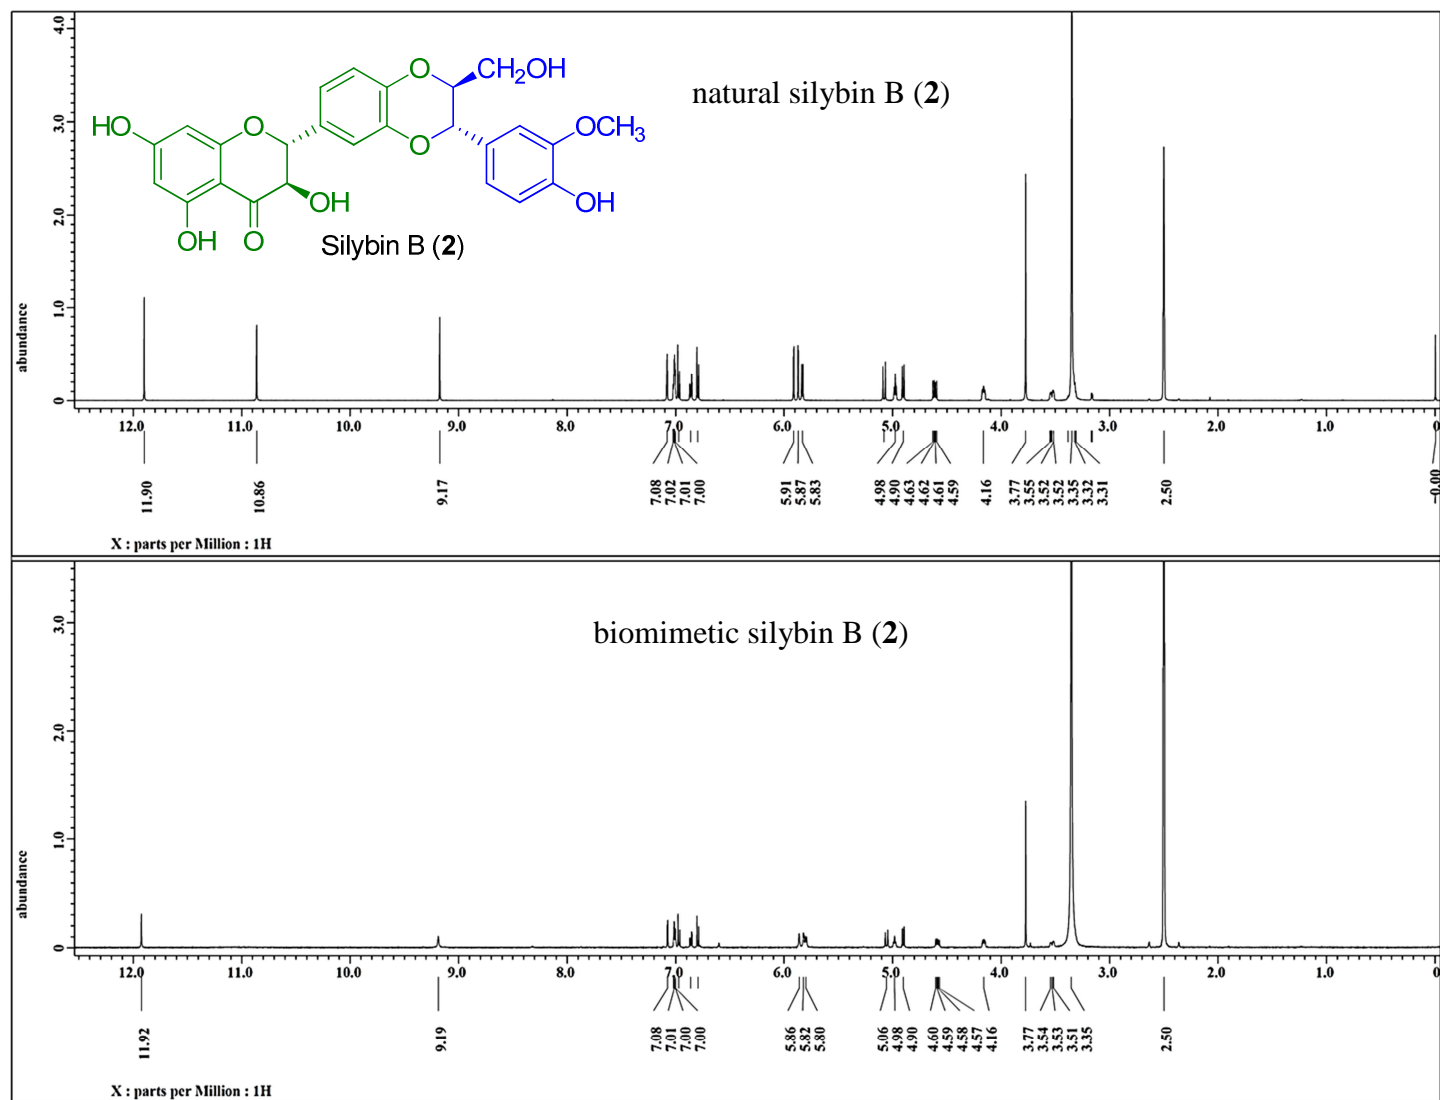

**Figure S10.**  $^{13}\text{C}$  NMR spectra (125 MHz in  $\text{DMSO-}d_6$ ) of natural (top) and biomimetic (bottom) silybin B

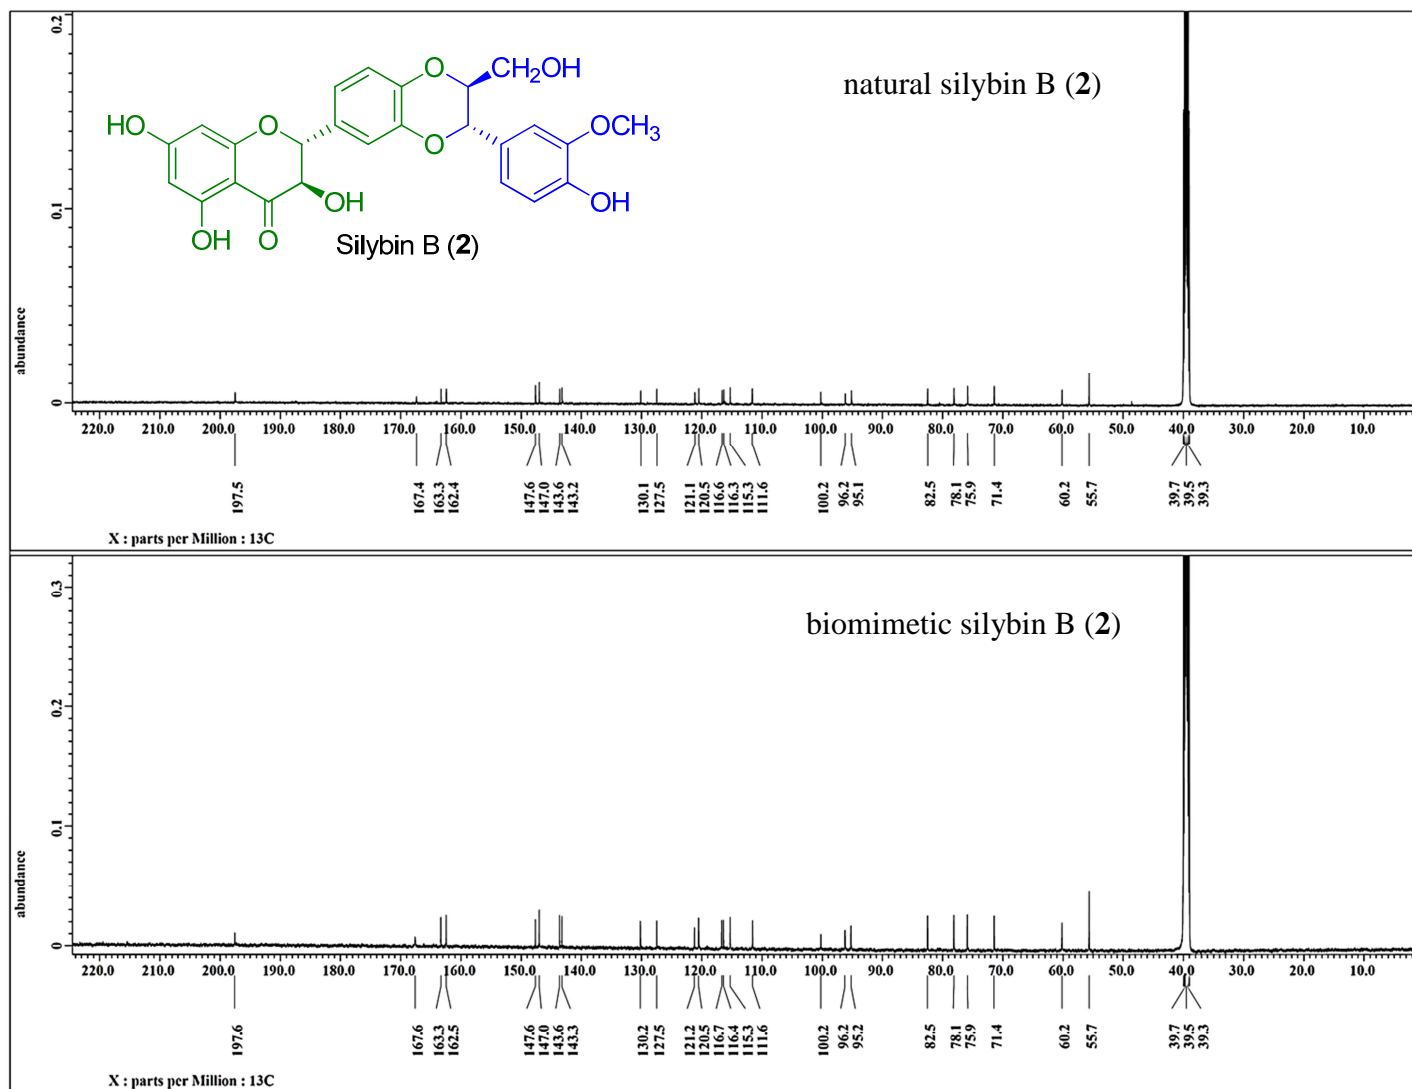

**Figure S11.**  $^1\text{H}$  NMR spectra (500 MHz in  $\text{DMSO-}d_6$ ) of natural (top) and biomimetic (bottom) isosilybin A

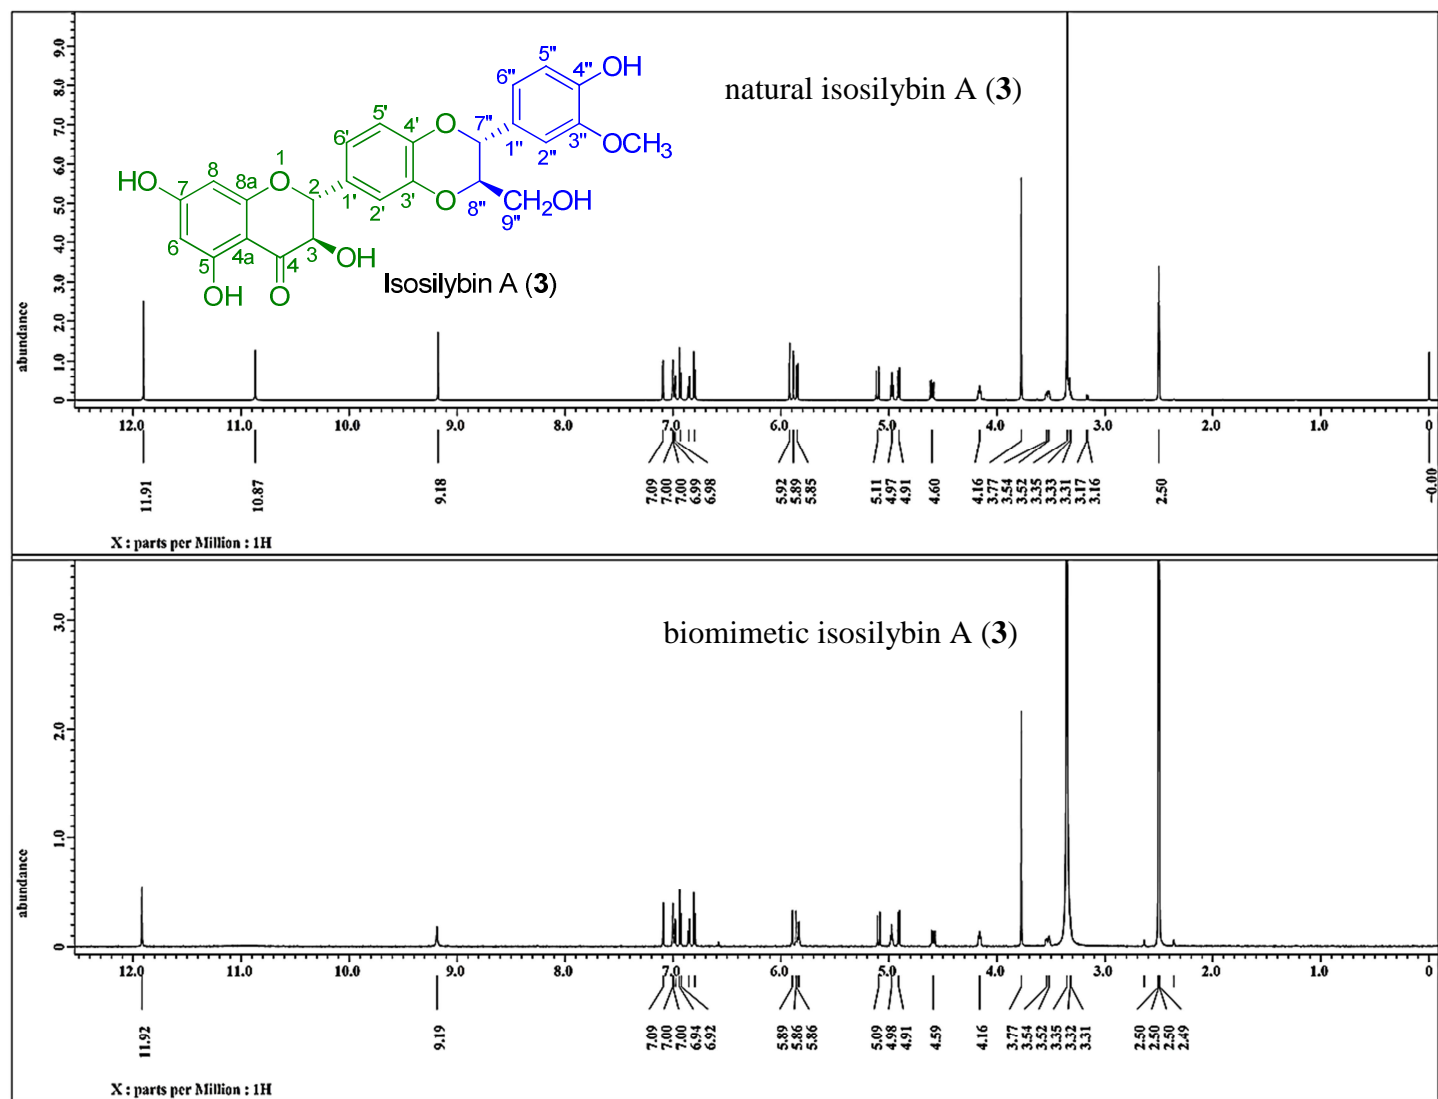

**Figure S12.**  $^{13}\text{C}$  NMR spectra (125 MHz in  $\text{DMSO-}d_6$ ) of natural (top) and biomimetic (bottom) isosilybin A (3)

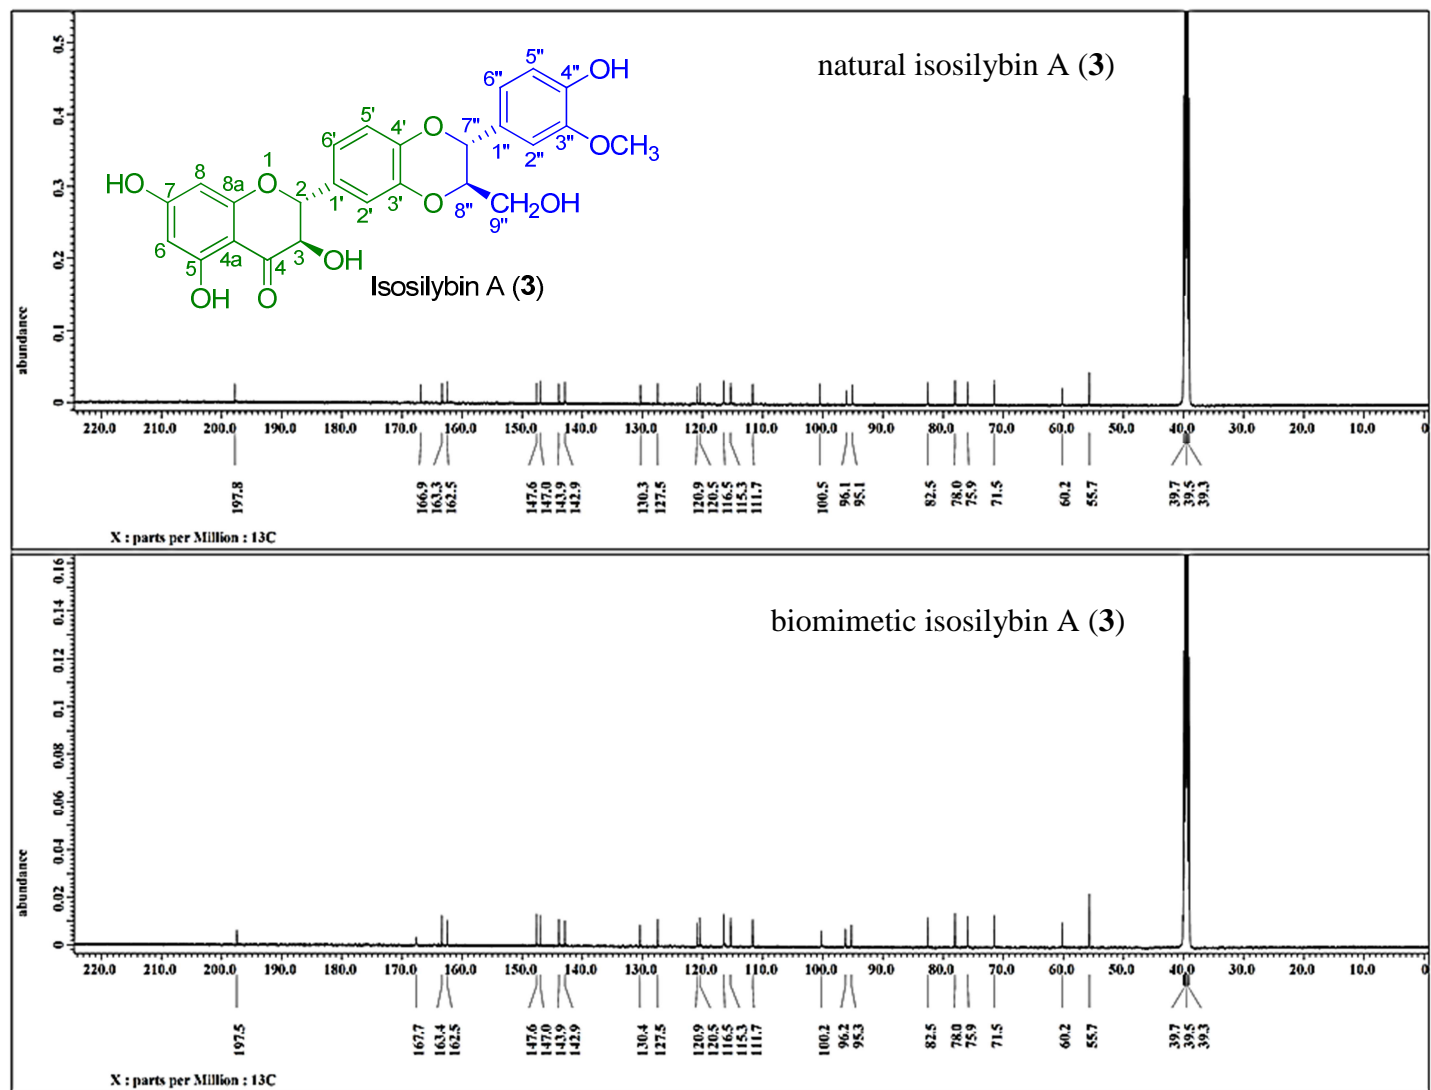

**Figure S13.**  $^1\text{H}$  NMR spectra (500 MHz in  $\text{DMSO-}d_6$ ) of natural (top) and biomimetic (bottom) isosilybin B

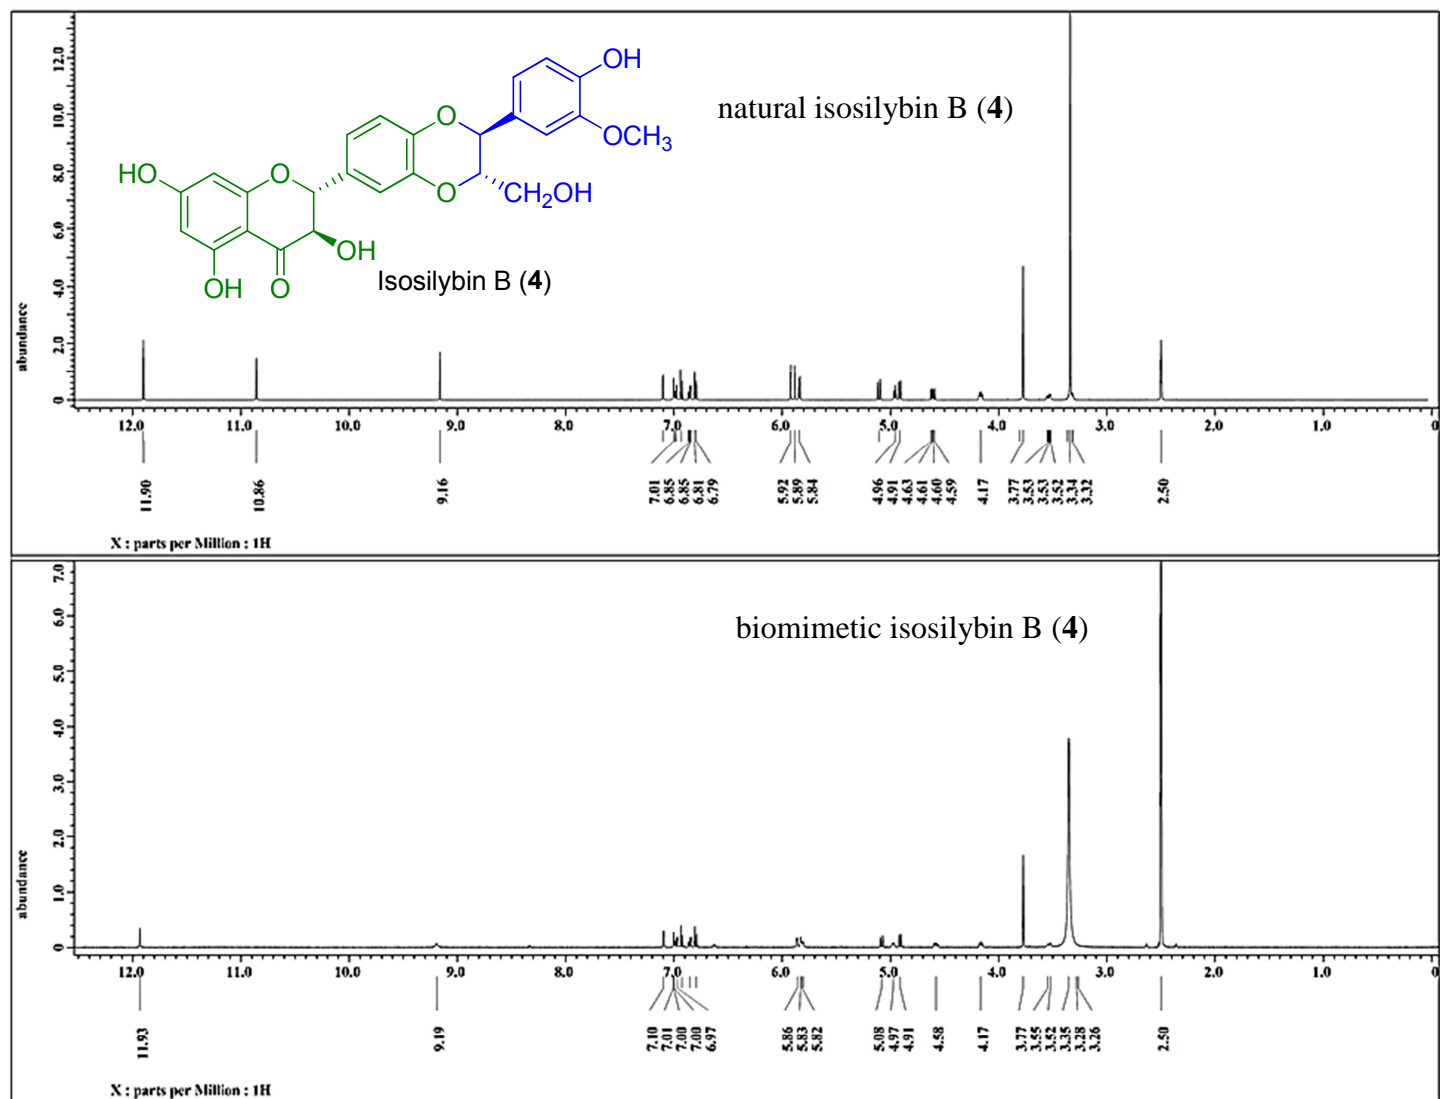



**Figure S14.**  $^{13}\text{C}$  NMR spectra (125 MHz in  $\text{DMSO-}d_6$ ) of natural (top) and biomimetic (bottom) isosilybin B

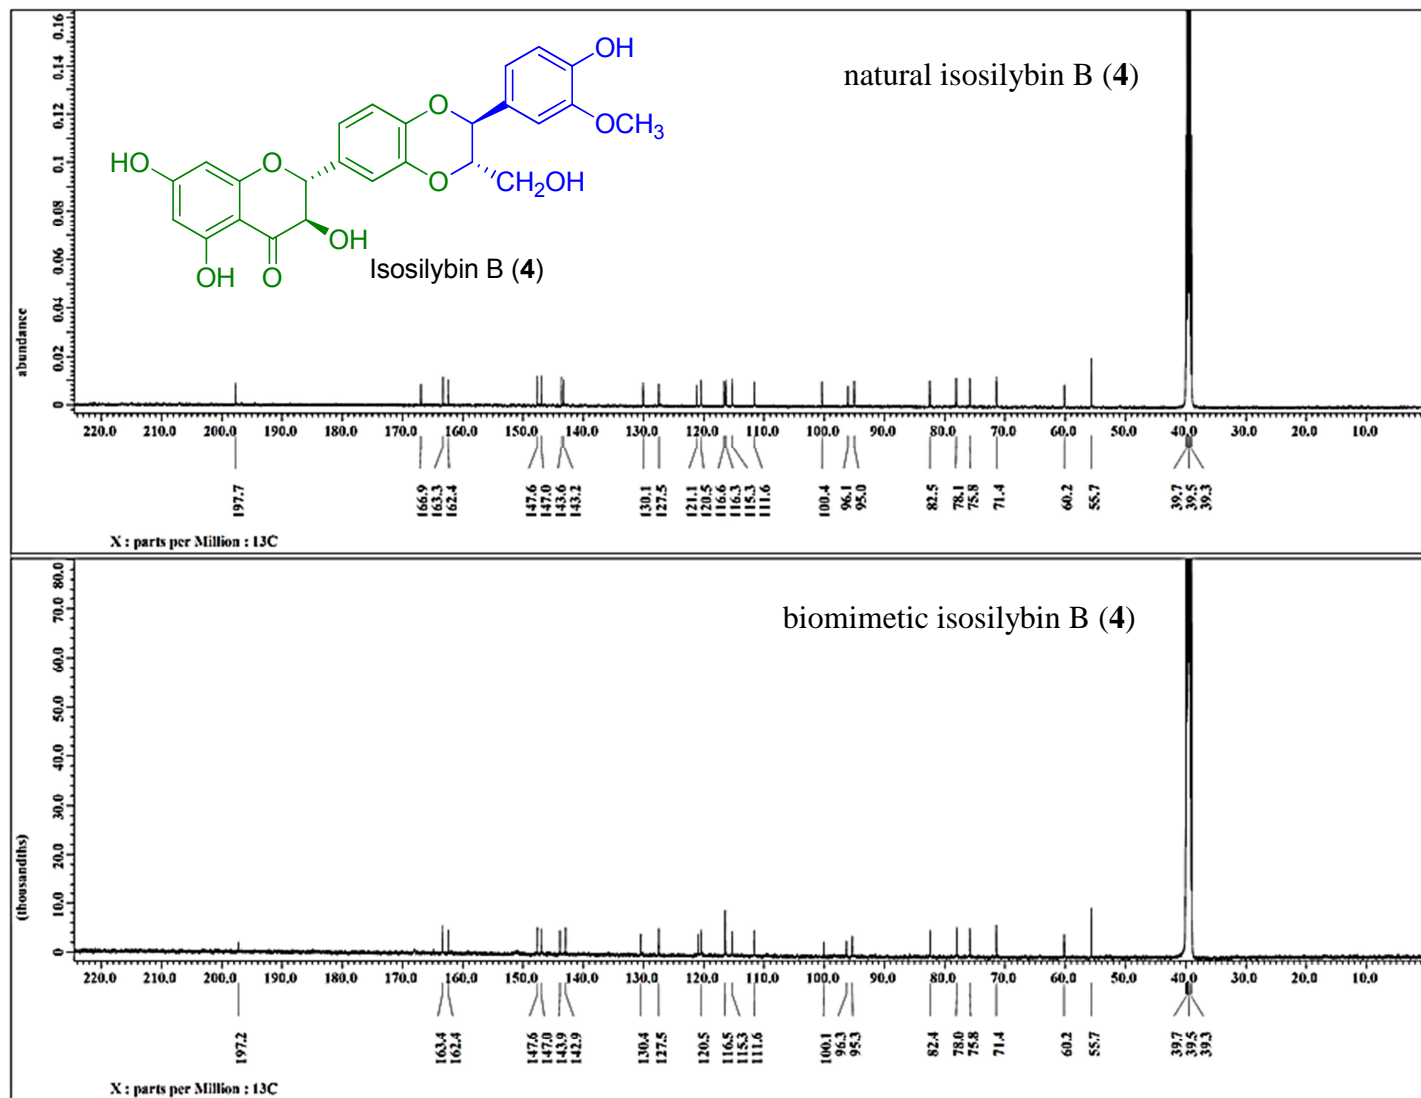

**Table S1.** <sup>1</sup>H NMR data (500 MHz in DMSO-*d*<sub>6</sub>) comparing natural flavonolignans to the biomimetic counterparts

| Position             | natural 1                     | biomimetic 1                  | natural 2                    | biomimetic 2                 | natural 3                     | biomimetic 3                  | natural 4                     | biomimetic 4                  |
|----------------------|-------------------------------|-------------------------------|------------------------------|------------------------------|-------------------------------|-------------------------------|-------------------------------|-------------------------------|
| 2                    | 5.08, d (11.5)                | 5.07, d (11.5)                | 5.08, d (11.5)               | 5.06, d (11.5)               | 5.11, d (10.9)                | 5.10, d (10.9)                | 5.11, d (11.5)                | 5.08, d (10.9)                |
| 3                    | 4.63, dd (11.5, 6.3)          | 4.60, dd (11.5, 6.3)          | 4.61, dd (11.5, 6.3)         | 4.59, dd (11.5, 6.3)         | 4.60, dd (10.9, 6.3)          | 4.58, dd (10.9, 6.3)          | 4.61, dd (11.5, 5.9)          | 4.58, dd (10.9, 6.3)          |
| 6                    | 5.91, d (1.7)                 | 5.90, d (1.7)                 | 5.91, d (2.3)                | 5.86, br d (1.7)             | 5.92, d (2.3)                 | 5.89, d (1.7)                 | 5.92, d (2.0)                 | 5.86, d (2.3)                 |
| 8                    | 5.86, d (1.7)                 | 5.86, d (1.7)                 | 5.87, d (2.3)                | 5.82, br d (1.7)             | 5.89, d (2.3)                 | 5.86, d (1.7)                 | 5.89, d (2.0)                 | 5.83, d (2.3)                 |
| 2'                   | 7.09, d (1.7)                 | 7.09, d (1.7)                 | 7.08, d (1.8)                | 7.07, d (1.7)                | 7.09, d (2.3)                 | 7.09, d (2.3)                 | 7.10, d (1.8)                 | 7.10, d (1.8)                 |
| 5'                   | 6.97, d (8.0)                 | 6.97, d (8.0)                 | 6.97, d (8.1)                | 6.97, d (8.6)                | 6.93, d (8.6)                 | 6.93, d (8.6)                 | 6.93, d (8.0)                 | 6.93, d (8.0)                 |
| 6'                   | 7.00, dd (8.0, 1.7)           | 7.00, dd (8.0, 1.7)           | 7.02, dd (8.1, 1.8)          | 7.01, dd (8.6, 1.7)          | 6.98, dd (8.6, 2.3)           | 6.98, dd (8.6, 2.3)           | 6.98, dd (8.0, 1.8)           | 6.98, dd (8.0, 1.8)           |
| 2''                  | 7.01, d (1.8)                 | 7.01, d (1.8)                 | 7.02, d (1.7)                | 7.02, d (1.7)                | 7.00, d (1.7)                 | 7.00, d (1.7)                 | 7.00, d (2.3)                 | 7.00, d (1.8)                 |
| 5''                  | 6.80, d (8.6)                 | 6.80, d (8.0)                 | 6.79, d (8.6)                | 6.79, d (8.0)                | 6.80, d (8.6)                 | 6.80, d (8.0)                 | 6.80, d (8.6)                 | 6.80, d (8.0)                 |
| 6''                  | 6.86, dd (8.6, 1.8)           | 6.85, dd (8.0, 1.7)           | 6.86, dd (8.6, 1.7)          | 6.86, dd (8.0, 1.7)          | 6.86, dd (8.6, 1.7)           | 6.86, dd (8.0, 1.7)           | 6.86, dd (8.6, 2.3)           | 6.85, dd (8.0, 1.8)           |
| 7''                  | 4.90, d (7.5)                 | 4.90, d (8.0)                 | 4.90, d (7.5)                | 4.90, d (7.5)                | 4.91, d (8.1)                 | 4.91, d (8.0)                 | 4.91, d (7.5)                 | 4.91, d (8.0)                 |
| 8''                  | 4.17, ddd<br>(7.5, 4.6, 2.3)  | 4.17, ddd<br>(8.0, 4.6, 2.3)  | 4.16, ddd<br>(7.5, 4.1, 2.3) | 4.16, ddd<br>(7.5, 4.1, 2.3) | 4.16, ddd<br>(8.1, 4.6, 2.3)  | 4.16, ddd<br>(8.0, 4.6, 2.3)  | 4.17, ddd<br>(7.5, 4.6, 2.3)  | 4.17, ddd<br>(8.0, 4.6, 2.3)  |
| 9''a                 | 3.53, ddd<br>(10.3, 5.2, 2.3) | 3.53, ddd<br>(10.3, 5.2, 2.3) | 3.53, ddd<br>(9.8, 4.6, 2.3) | 3.52, ddd<br>(9.7, 5.2, 2.3) | 3.53, ddd<br>(12.0, 4.6, 2.3) | 3.53, ddd<br>(12.0, 5.2, 2.3) | 3.54, ddd<br>(11.9, 5.2, 2.3) | 3.53, ddd<br>(11.9, 5.2, 2.3) |
| 9''b                 | 3.33, m                       | 3.32, m                       | 3.33, m                      | 3.31, m                      | 3.33, m                       | 3.33, m                       | 3.33, m                       | 3.33, m                       |
| 3''-OCH <sub>3</sub> | 3.77, s                       | 3.77, s                       | 3.77, s                      | 3.77, s                      | 3.78, s                       | 3.77, s                       | 3.77, s                       | 3.77, s                       |
| 3-OH                 | 5.83, d (6.3)                 | 5.81, d (6.3)                 | 5.83, d (6.3)                | 5.80, d (6.3)                | 5.83, d (6.3)                 | 5.84, d (6.3)                 | 5.84, d (5.9)                 | 5.81, d (6.3)                 |
| 5-OH                 | 11.90, s                      | 11.90, s                      | 11.90, s                     | 11.90, s                     | 11.90, s                      | 11.92, s                      | 11.90, s                      | 11.93, s                      |
| 7-OH                 | 10.86, s                      | -                             | 10.86, s                     | -                            | 10.85, s                      | -                             | 10.86, s                      | -                             |
| 4''-OH               | 9.18, s                       | 9.18, s                       | 9.17, s                      | 9.19, s                      | 9.15, s                       | 9.19, s                       | 9.16, s                       | 9.19, s                       |
| 9''-OH               | 4.97, dd (5.7, 5.2)           | 4.96, dd (5.7, 5.2)           | 4.98, dd (5.7, 4.6)          | 4.99, dd (5.7, 5.2)          | 4.95, dd (5.7, 4.6)           | 4.98, dd (5.7, 5.2)           | 4.96, dd (5.5, 5.0)           | 4.97, dd (5.7, 5.2)           |

chemical shifts in  $\delta$ , coupling constants in Hz

**Table S2.**  $^{13}\text{C}$  NMR data (125 MHz in  $\text{DMSO-}d_6$ ) comparing natural flavonolignans to the biomimetic counterparts

| Position             | type            | natural 1 | biomimetic 1 | natural 2 | biomimetic 2 | natural 3 | biomimetic 3 | natural 4 | biomimetic 4 |
|----------------------|-----------------|-----------|--------------|-----------|--------------|-----------|--------------|-----------|--------------|
| 2                    | CH              | 82.6      | 82.5         | 82.5      | 82.5         | 82.5      | 82.5         | 82.5      | 82.4         |
| 3                    | CH              | 71.4      | 71.4         | 71.4      | 71.4         | 71.5      | 71.5         | 71.5      | 71.4         |
| 4                    | C               | 197.8     | 197.6        | 197.7     | 197.6        | 197.8     | 197.5        | 197.8     | 197.2        |
| 4a                   | C               | 100.4     | 100.2        | 100.4     | 100.2        | 100.5     | 100.2        | 100.5     | 100.1        |
| 5                    | C               | 163.3     | 163.3        | 163.3     | 163.3        | 163.3     | 163.4        | 163.3     | 163.4        |
| 6                    | CH              | 96.1      | 96.2         | 96.1      | 96.2         | 96.1      | 96.2         | 96.1      | 96.3         |
| 7                    | C               | 167.1     | 167.5        | 166.9     | 167.6        | 166.9     | 167.7        | 166.9     | 167.0        |
| 8                    | CH              | 95.1      | 95.2         | 95.0      | 95.2         | 95.1      | 95.3         | 95.1      | 95.3         |
| 8a                   | C               | 162.5     | 162.5        | 162.4     | 162.5        | 162.5     | 162.5        | 162.5     | 162.4        |
| 1'                   | C               | 130.1     | 130.1        | 130.1     | 130.2        | 130.3     | 130.4        | 130.3     | 130.4        |
| 2'                   | CH              | 116.6     | 116.6        | 116.6     | 116.7        | 116.5     | 116.5        | 116.5     | 116.5        |
| 3'                   | C               | 143.3     | 143.3        | 143.2     | 143.3        | 142.9     | 142.9        | 142.9     | 142.9        |
| 4'                   | C               | 143.7     | 143.7        | 143.6     | 143.6        | 143.9     | 143.9        | 143.9     | 143.9        |
| 5'                   | CH              | 116.3     | 116.3        | 116.3     | 116.4        | 116.4     | 116.5        | 116.5     | 116.5        |
| 6'                   | CH              | 121.4     | 121.4        | 121.4     | 121.2        | 120.9     | 120.9        | 120.9     | 120.9        |
| 1''                  | C               | 127.5     | 127.5        | 127.5     | 127.5        | 127.5     | 127.5        | 127.5     | 127.5        |
| 2''                  | CH              | 111.6     | 111.6        | 111.6     | 111.6        | 111.7     | 111.7        | 111.7     | 111.6        |
| 3''                  | C               | 147.6     | 147.6        | 147.6     | 147.6        | 147.6     | 147.6        | 147.6     | 147.6        |
| 4''                  | C               | 147.0     | 147.0        | 147.0     | 147.0        | 147.0     | 147.0        | 147.0     | 147.0        |
| 5''                  | CH              | 115.3     | 115.3        | 115.3     | 115.3        | 115.3     | 115.3        | 115.3     | 115.3        |
| 6''                  | CH              | 120.5     | 120.5        | 120.5     | 120.5        | 120.5     | 120.5        | 120.5     | 120.5        |
| 7''                  | CH              | 75.9      | 75.9         | 75.8      | 75.9         | 75.9      | 75.9         | 75.9      | 75.8         |
| 8''                  | CH              | 78.1      | 78.1         | 78.1      | 78.1         | 78.0      | 78.0         | 78.0      | 78.0         |
| 9''                  | CH <sub>2</sub> | 60.2      | 60.2         | 60.2      | 60.2         | 60.2      | 60.2         | 60.2      | 60.2         |
| 3''-OCH <sub>3</sub> | CH <sub>3</sub> | 55.7      | 55.7         | 55.7      | 55.7         | 55.7      | 55.7         | 55.7      | 55.7         |

**Figure S15.**  $^1\text{H}$  NMR spectra (500 MHz in acetone- $d_6$ ) of purchased (top) and synthetic (bottom) coniferyl aldehyde (**16**)

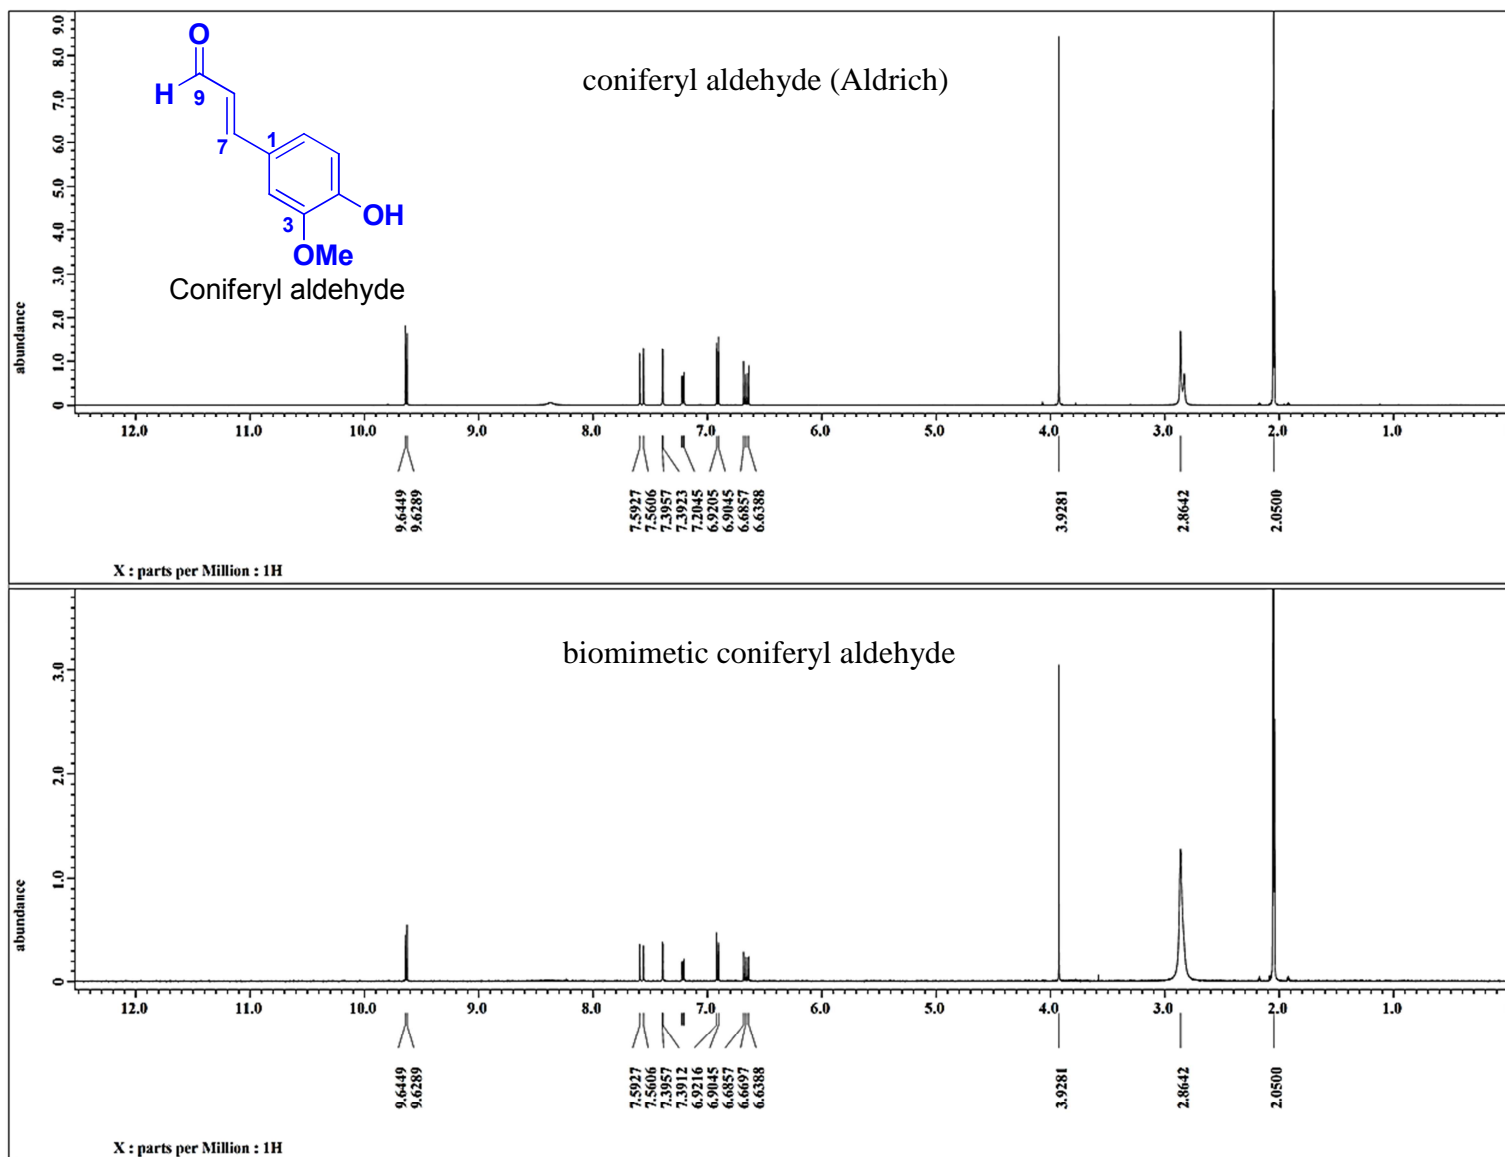

**Figure S16.**  $^1\text{H}$  NMR spectrum (500 MHz in acetone- $d_6$ ) of ( $\pm$ )-dehydrodiconiferyl alcohol (**18**)

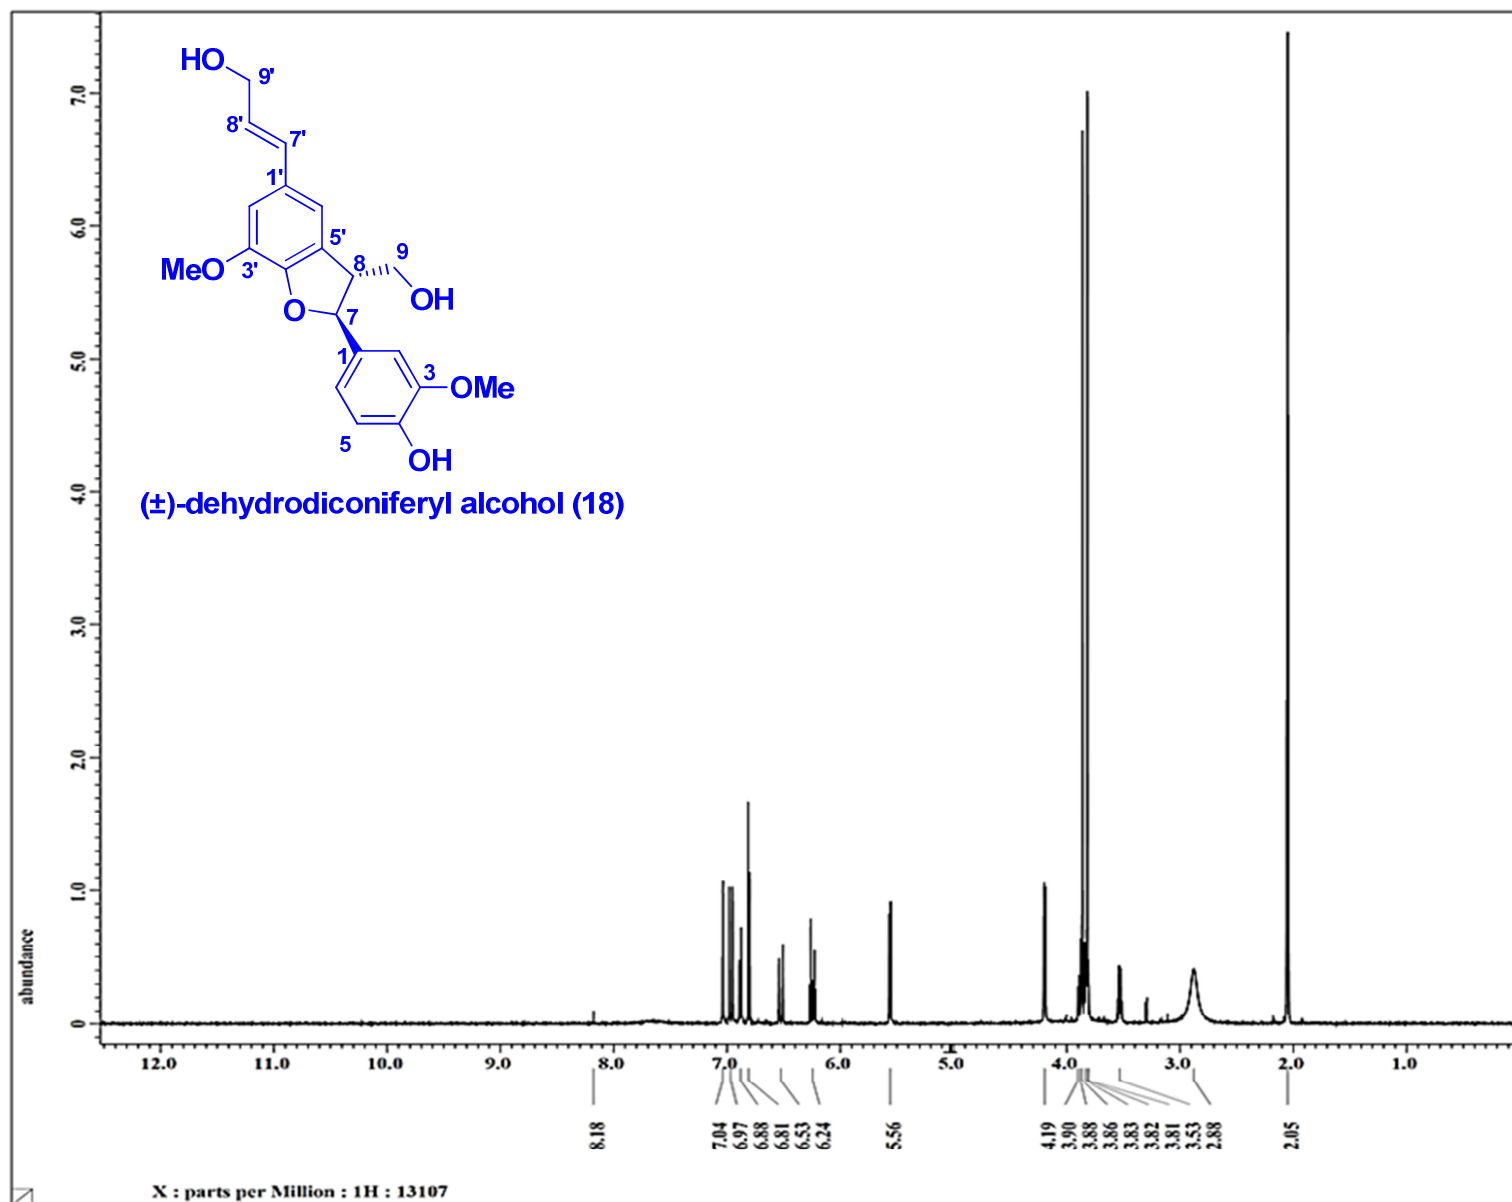

**Figure S17.**  $^{13}\text{C}$  NMR spectrum (125 MHz in acetone- $d_6$ ) of ( $\pm$ )-dehydrodiconiferyl alcohol (**18**)

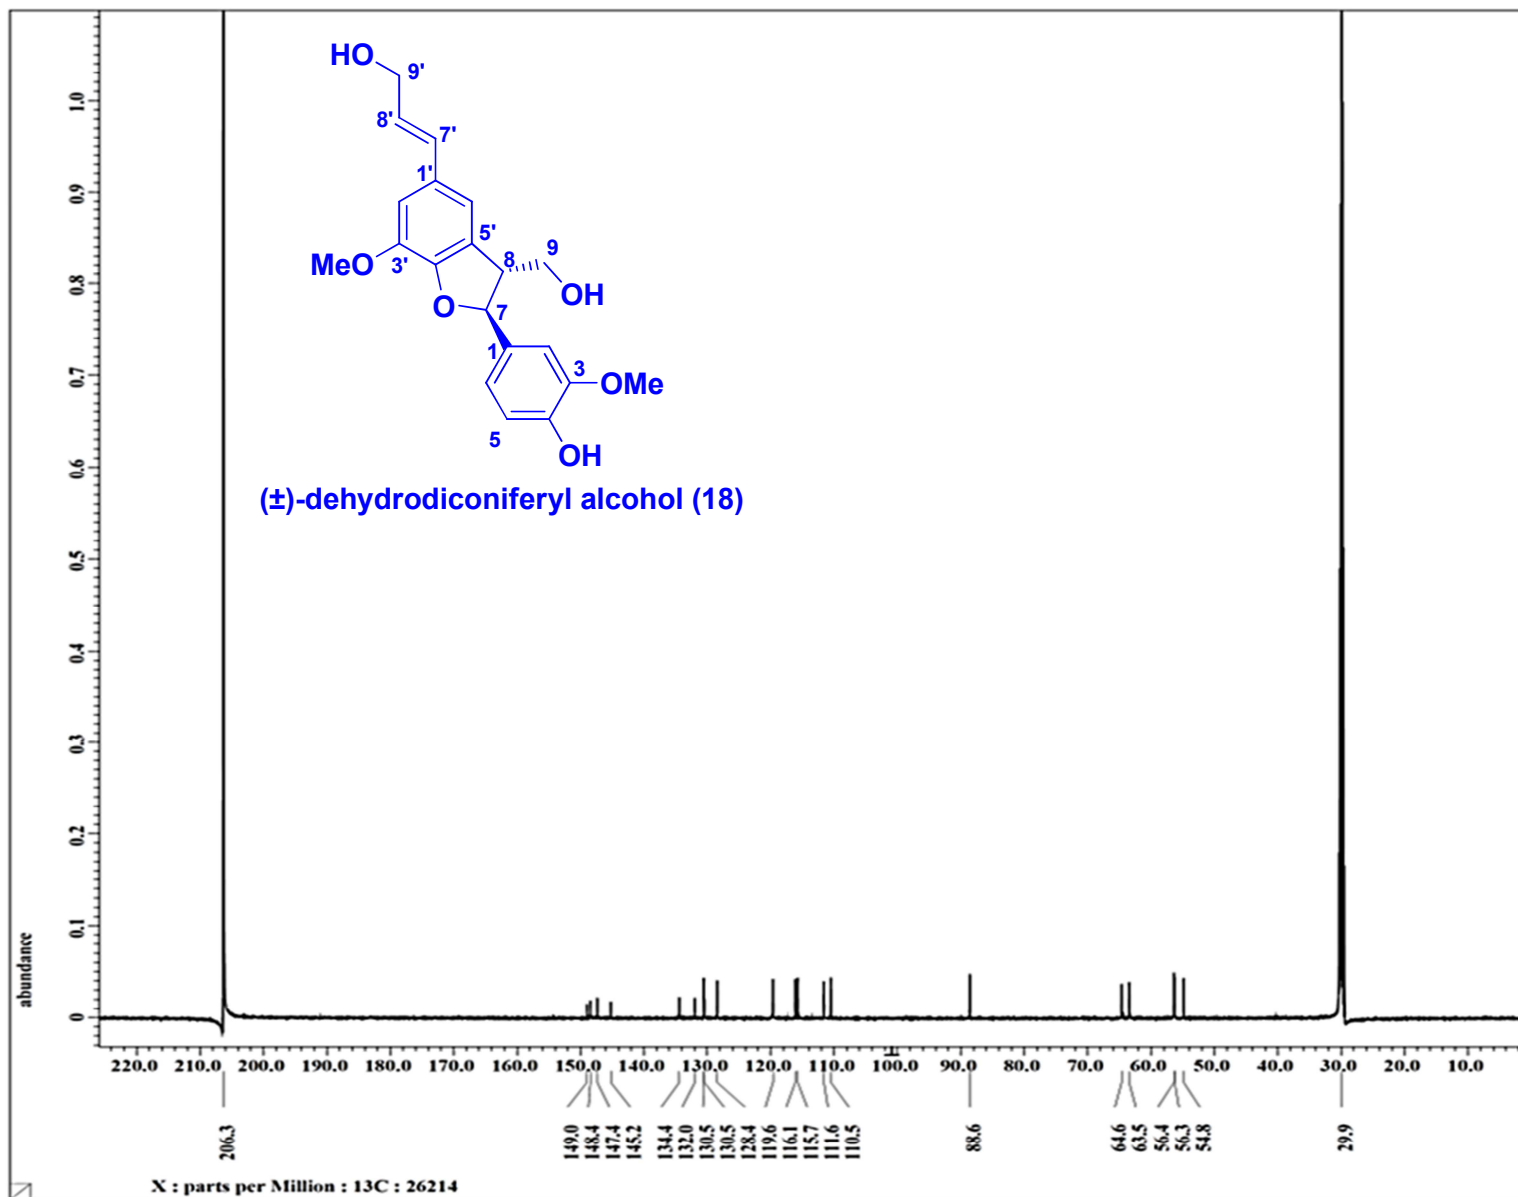

**Table S3.** <sup>1</sup>H NMR data (500 MHz in acetone-*d*<sub>6</sub>) comparing biomimetic (±)-dehydrodiconiferyl alcohol (**18**) to the literature data

| <b>Position</b>  | <b>Type</b>     | <b>Experimental</b><br>(shift, multiplicity, coupling) | <b>Literature<sup>a</sup></b><br>(shift, multiplicity, coupling) |
|------------------|-----------------|--------------------------------------------------------|------------------------------------------------------------------|
| 2                | CH              | 7.04, d (2.3)                                          | 7.03, d (2.0)                                                    |
| 5                | CH              | 6.81, d (8.0)                                          | 6.80, d (8.1)                                                    |
| 6                | CH              | 6.88, dd (8.0, 1.7)                                    | 6.87, ddd (8.1, 2.0 and 0.5)                                     |
| 7                | CH              | 5.56, br d (6.3)                                       | 5.56, dt (6.3, not given)                                        |
| 8                | CH              | 3.53, q (6.3)                                          | 3.53 br q (not given)                                            |
| 9a               | CH <sub>2</sub> | 3.83, dd (10.3, 6.9)                                   | 3.78 m                                                           |
| 9b               | CH <sub>2</sub> | 3.88, dd (10.3, 5.2)                                   | 3.88 m                                                           |
| OCH <sub>3</sub> | CH <sub>3</sub> | 3.82, s                                                | 3.81, s                                                          |
| 2'               | CH              | 6.95, d (1.7)                                          | 6.94, br s                                                       |
| 6'               | CH              | 6.98, br s                                             | 6.97, br s                                                       |
| 7'               | CH              | 6.52, dt (16.0, 1.7)                                   | 6.52, dt (15.8, 1.5)                                             |
| 8'               | CH              | 6.23, dt (16.0, 5.2)                                   | 6.23, dt (15.8, 5.5)                                             |
| 9'               | CH <sub>2</sub> | 4.20, dd (5.7, 1.8)                                    | 4.19, td (5.2, 1.5)                                              |
| OCH <sub>3</sub> | CH <sub>3</sub> | 3.86, s                                                | 3.85, s                                                          |

chemical shifts in δ, coupling constants in Hz

<sup>a</sup>Quideau, S.; John, R. *Holzforschung*, **1994**, *48*, 12-22.

**Table S4.**  $^{13}\text{C}$  NMR data (125 MHz in  $\text{CDCl}_3$ ) comparing biomimetic ( $\pm$ )-dehydrodiconiferyl alcohol (**18**) to the literature data

| Position       | Type          | Experimental | Literature <sup>a</sup> |
|----------------|---------------|--------------|-------------------------|
| 1              | C             | 134.4        | 134.4                   |
| 2              | CH            | 110.5        | 110.5                   |
| 3              | C             | 148.4        | 148.4                   |
| 4              | C             | 147.4        | 147.3                   |
| 5              | CH            | 115.7        | 115.7                   |
| 6              | CH            | 119.6        | 119.6                   |
| 7              | CH            | 88.6         | 88.5                    |
| 8              | CH            | 54.8         | 54.7                    |
| 9              | $\text{CH}_2$ | 64.6         | 64.6                    |
| $\text{OCH}_3$ | $\text{CH}_3$ | 56.3         | 56.3                    |
| 1              | C             | 132.0        | 131.9                   |
| 2              | CH            | 111.6        | 111.7                   |
| 3              | C             | 145.2        | 145.1                   |
| 4              | C             | 149.0        | 148.8                   |
| 5              | C             | 130.5        | 130.4                   |
| 6              | CH            | 116.1        | 116.1                   |
| 7              | CH            | 130.5        | 130.5                   |
| 8              | CH            | 128.4        | 128.3                   |
| 9              | $\text{CH}_2$ | 63.5         | 63.4                    |
| $\text{OCH}_3$ | $\text{CH}_3$ | 56.4         | 56.4                    |

chemical shifts in  $\delta$

<sup>a</sup>Quideau, S.; John, R. *Holzforschung*, **1994**, *48*, 12-22.



**Figure S18.**  $^1\text{H}$  NMR spectrum (500 MHz in  $\text{CDCl}_3$ ) of 4-(3-hydroxyprop-1-yn-1-yl)-2-methoxyphenol

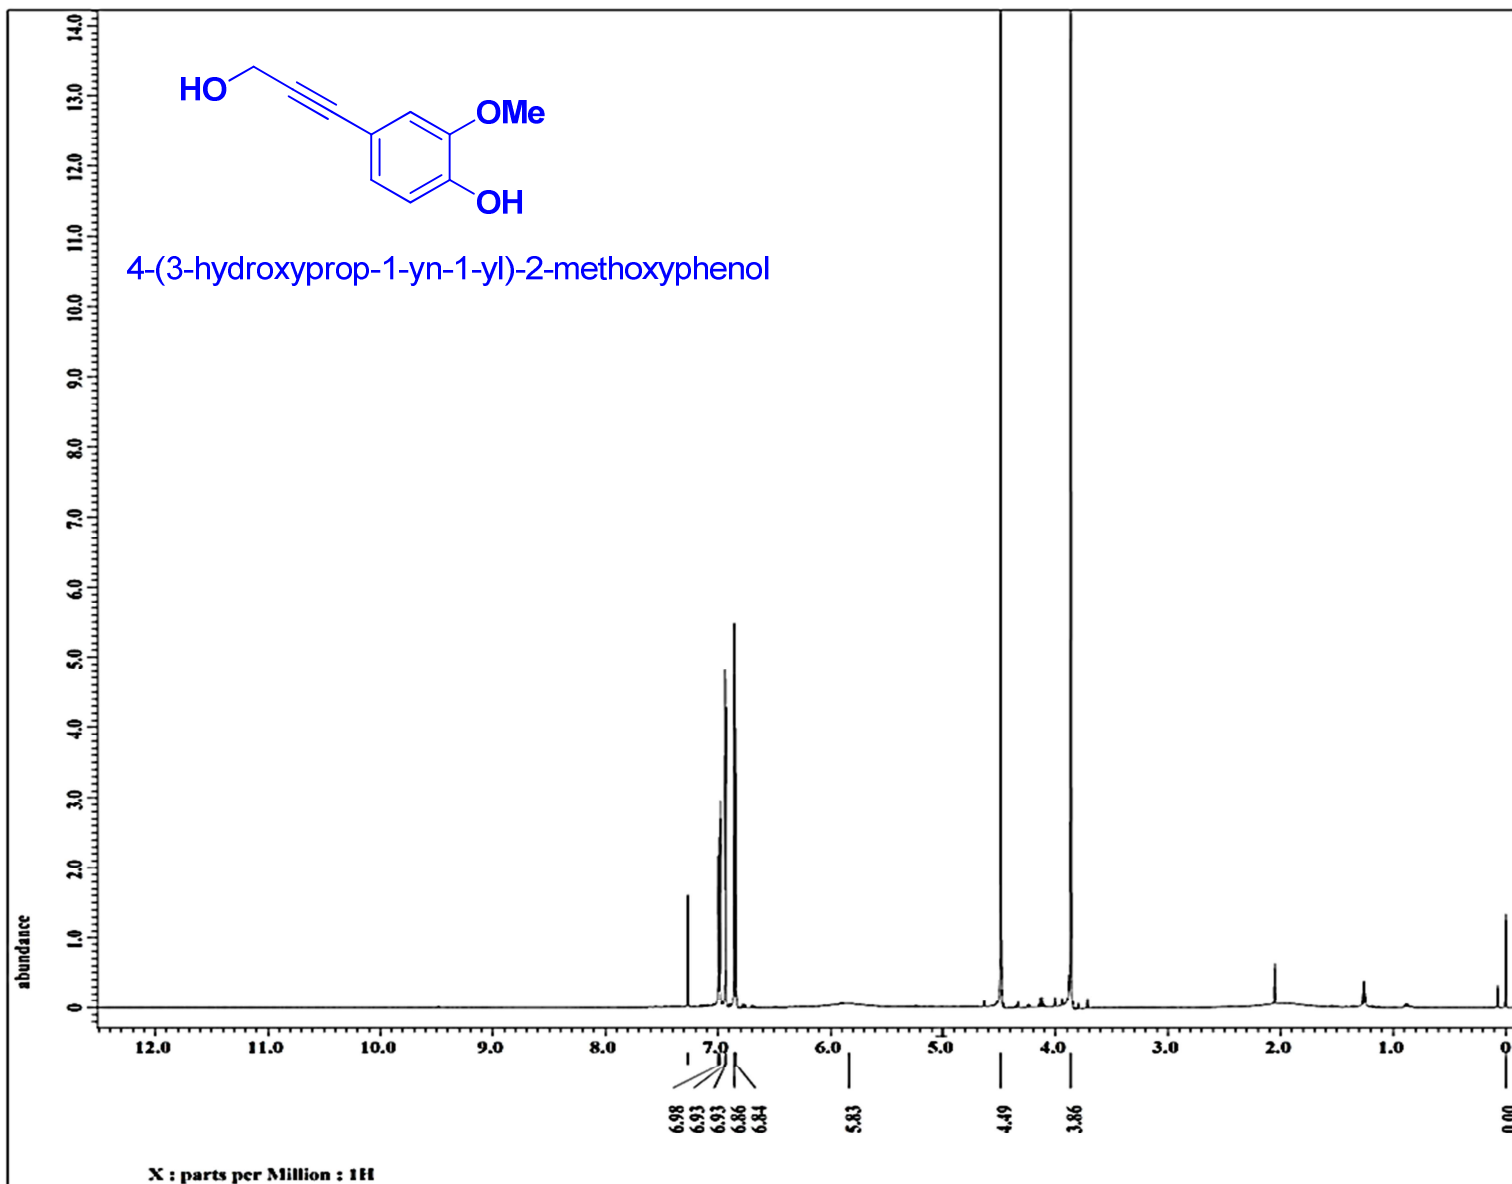

**Figure S19.**  $^{13}\text{C}$  NMR spectrum (125 MHz in  $\text{CDCl}_3$ ) of 4-(3-hydroxyprop-1-yn-1-yl)-2-methoxyphenol

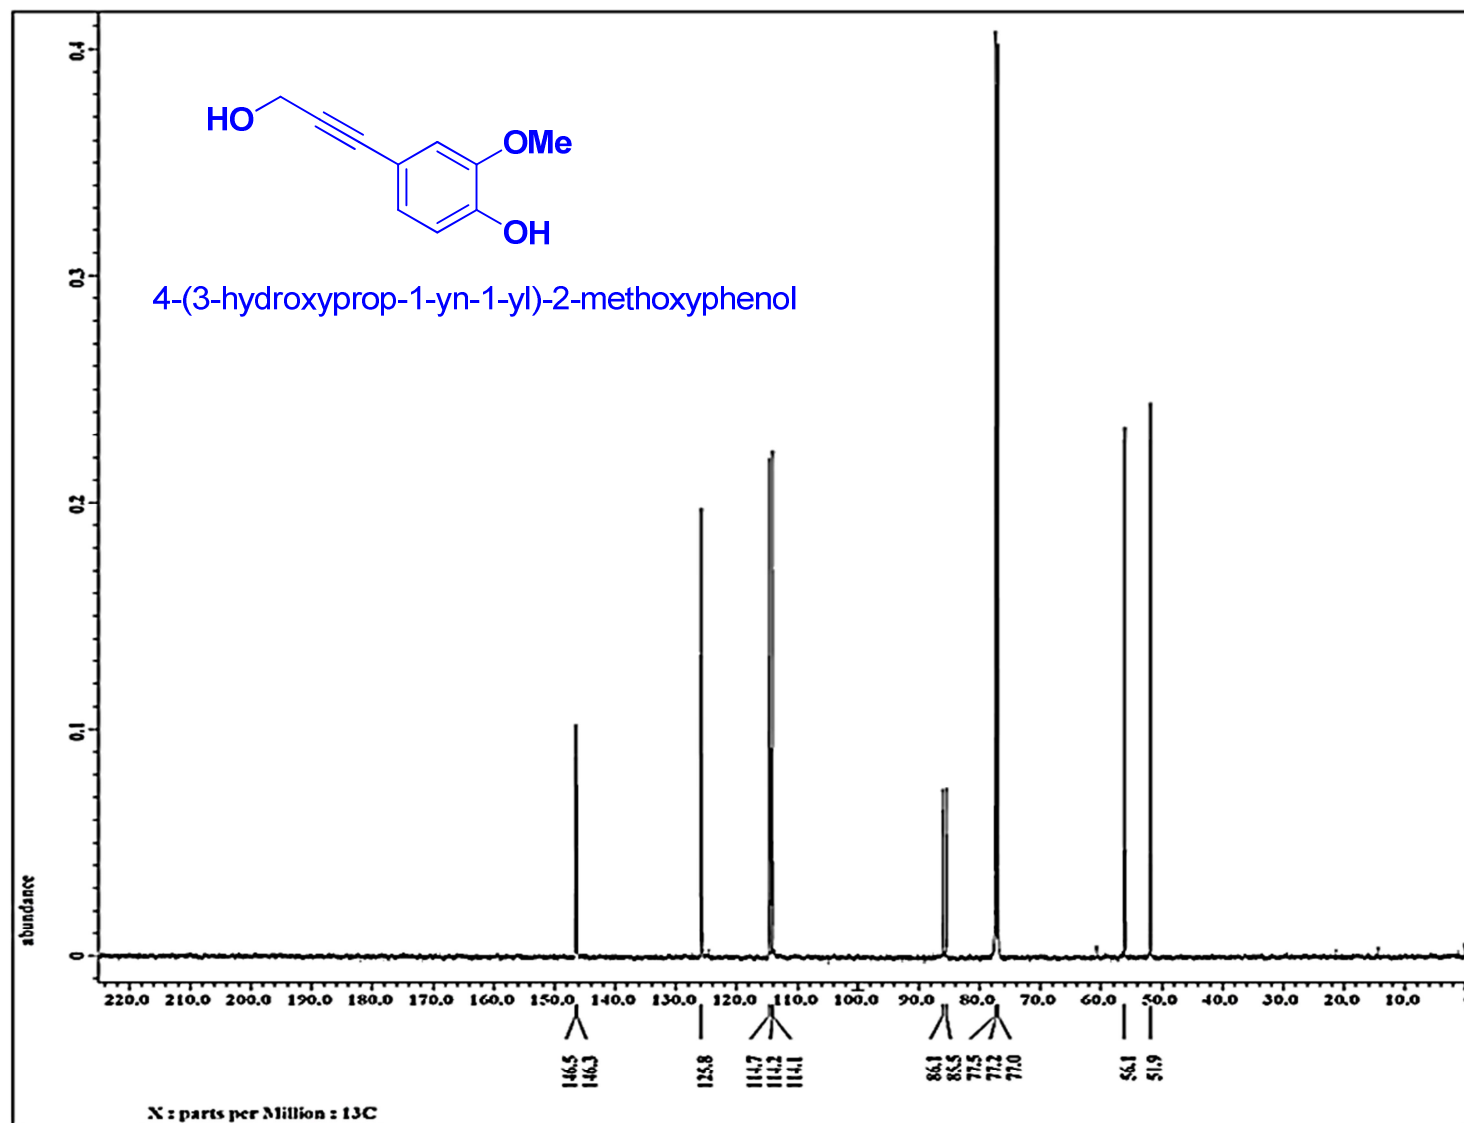

Figure S20.  $^1\text{H}$  NMR spectrum (500 MHz acetone- $d_6$ ) of *cis*-coniferyl alcohol (**19**)

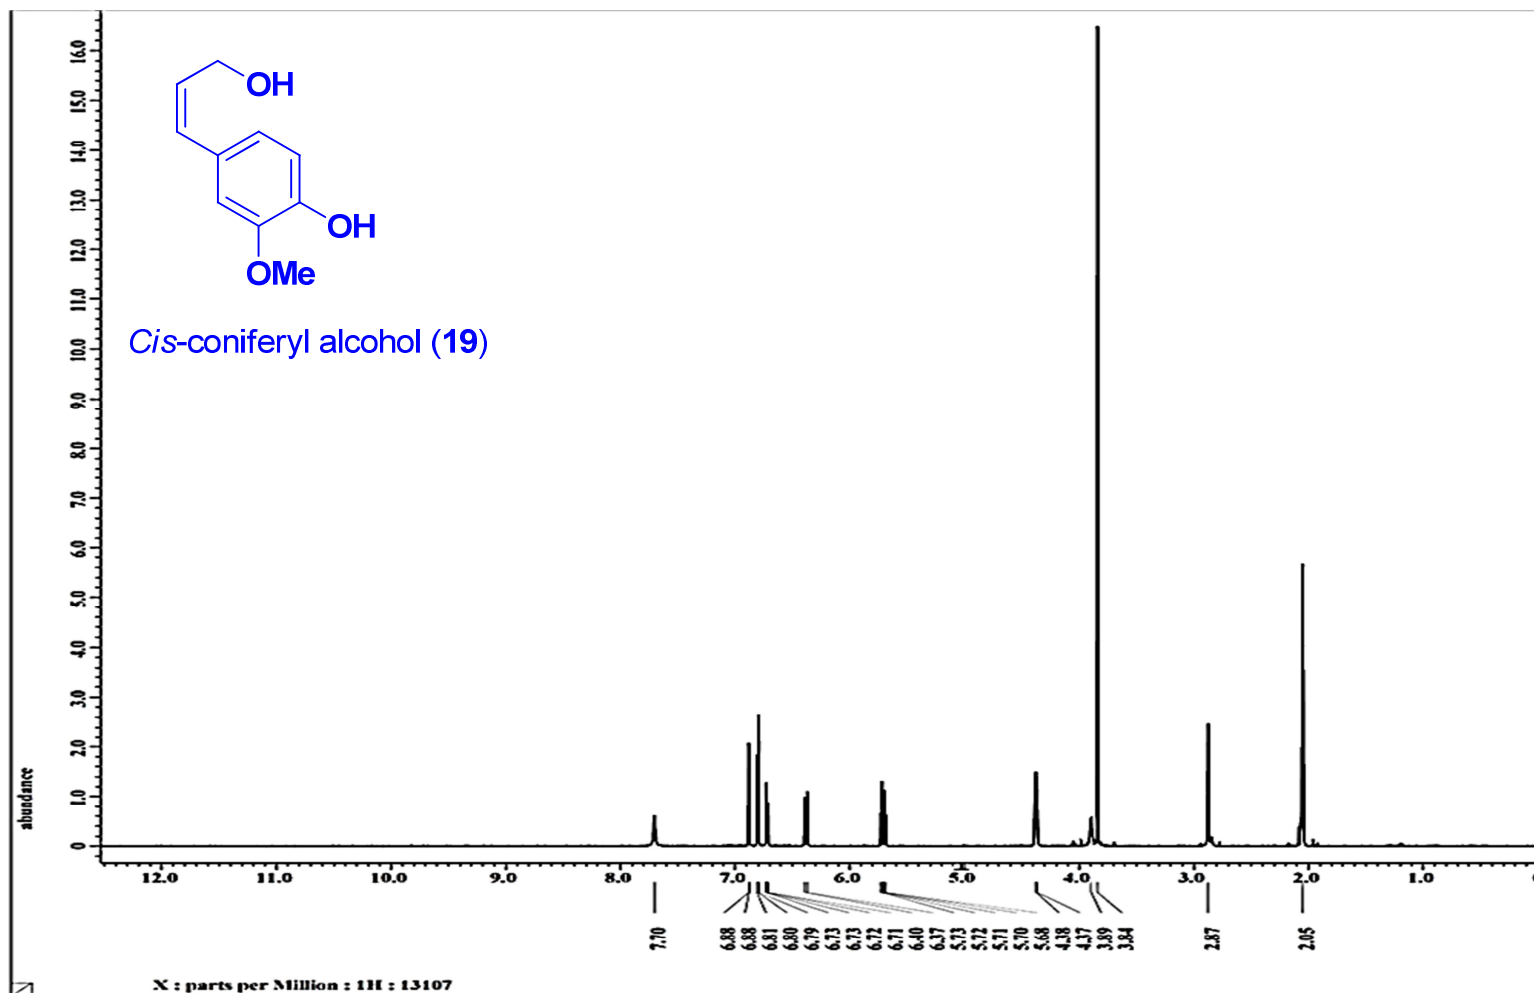

**Table S5.** <sup>1</sup>H NMR data (500 MHz in acetone-*d*<sub>6</sub>) comparing biomimetic *cis*-coniferyl alcohol (**19**) to the literature data

| Position         | Type            | Experimental<br>(shift, multiplicity, coupling) | Literature <sup>a</sup><br>(shift, multiplicity, coupling) |
|------------------|-----------------|-------------------------------------------------|------------------------------------------------------------|
| 2                | CH              | 6.88, d (1.7)                                   | 6.87, d (2.0)                                              |
| 5                | CH              | 6.80, d (8.6)                                   | 6.79, d (8.1)                                              |
| 6                | CH              | 6.72, dd (8.0, 1.7)                             | 6.72, dd (8.1, 2.0)                                        |
| 7                | CH              | 6.39, dt (12.0, 1.7)                            | 6.37, dt (11.8, 1.8)                                       |
| 8                | CH              | 5.71, dt (12.0, 6.3)                            | 5.70, dt (11.8, 6.2)                                       |
| 9                | CH <sub>2</sub> | 4.37, br t (4.6)                                | 4.37, ddd (6.2, 5.4, 1.8)                                  |
| OCH <sub>3</sub> | CH <sub>3</sub> | 3.84, s                                         | 3.84, s                                                    |
| Ar-OH            | OH              | 7.70, br s                                      | 7.60, br s                                                 |
| OH               | OH              | 3.89, t (5.2)                                   | 3.81, t (5.4)                                              |

<sup>a</sup> Ralph, J.; Zhang, Y. S. *Tetrahedron* **1998**, *54*, 1349-1354.
